# Supplementary material
Source: PubMed Central journal article supplement (PMC5116706)
Supplement: IAI.00608-16_zii999091877so1.pdf [file IAI.00608-16_zii999091877so1.pdf]

**TABLE S1 Categories of differentially regulated genes comparing the isogenic FabT deletion mutant to M1GAS2221 wild-type**

|                                                                 | 35°C       |           |            |            | 40°C      |           |            |            |
|-----------------------------------------------------------------|------------|-----------|------------|------------|-----------|-----------|------------|------------|
|                                                                 | ME         |           | Stat       |            | ME        |           | Stat       |            |
|                                                                 | Up         | Down      | Up         | Down       | Up        | Down      | Up         | Down       |
| Virulence                                                       | 4          | 4         | 5          | 4          | 4         | 6         | 9          | 4          |
| Cell wall, membrane and envelope biogenesis                     | 2          | 2         | 12         | 3          | 2         | --        | 7          | 14         |
| Transport                                                       | 4          | 10        | 24         | 33         | 6         | 1         | 44         | 17         |
| Transcription                                                   | 7          | 7         | 5          | 21         | 5         | --        | 10         | 43         |
| Translation                                                     | --         | 6         | 24         | 12         | --        | --        | 6          | 59         |
| Replication, repair and cell division                           | 7          | 1         | 2          | 1          | 1         | --        | --         | 4          |
| DNA processing and metabolism                                   | --         | 2         | 5          | 8          | 3         | 1         | 4          | 20         |
| General stress                                                  | 3          | 1         | 1          | 6          | --        | 1         | 2          | 10         |
| Energy production and conversion                                | 1          | --        | 4          | 1          | --        | --        | 4          | --         |
| Posttranslational modification, protein turnover and chaperones | 5          | 2         | 6          | 9          | 1         | 2         | 8          | 12         |
| Nucleotide transport and metabolism                             | 1          | 8         | 9          | 23         | 1         | --        | 6          | 14         |
| Amino acid transport and metabolism                             | 1          | 10        | 6          | 5          | --        | --        | --         | 1          |
| Inorganic ion transport and metabolism                          | --         | 6         | 11         | 6          | 1         | 2         | 8          | 2          |
| Metabolism                                                      |            |           |            |            |           |           |            |            |
| General                                                         | --         | --        | 1          | --         | --        | --        | --         | --         |
| Carbon                                                          | 8          | 12        | 2          | 35         | 3         | 3         | 11         | 18         |
| Lipids                                                          | 11         | --        | 13         | 1          | 9         | --        | 12         | 3          |
| Fermentation                                                    | 1          | 3         | 1          | 5          | 2         | --        | 2          | 3          |
| Coenzymes and cofactors                                         | 1          | 1         | 4          | 1          | --        | 1         | 3          | 8          |
| Phage proteins                                                  | 33         | 1         | 18         | 5          | --        | --        | --         | 42         |
| Hypothetical proteins                                           | 9          | 15        | 15         | 31         | 2         | 9         | 14         | 56         |
| Function unknown                                                | 6          | 7         | 11         | 20         | 2         | 1         | 12         | 27         |
| Other                                                           | 1          | --        | --         | 2          | --        | --        | 2          | 3          |
| <b>TOTAL</b>                                                    | <b>105</b> | <b>98</b> | <b>179</b> | <b>232</b> | <b>42</b> | <b>27</b> | <b>164</b> | <b>360</b> |

**TABLE S2 Differentially-expressed genes comparing the isogenic *fabT* deletion mutant to the wild-type MGAS2221 grown at 35°C**

**A. Up-regulated genes during mid-exponential phase**

| Locus tag                                       | Gene        | Fold change | Function                                                                |
|-------------------------------------------------|-------------|-------------|-------------------------------------------------------------------------|
| <b>Amino acid metabolism and transport</b>      |             |             |                                                                         |
| M5005_Spy1329                                   | <i>cysM</i> | <b>6.2</b>  | Cystathionine beta-synthase (CBS) and Cysteine synthase                 |
| <b>Cell wall, membrane, envelope biogenesis</b> |             |             |                                                                         |
| M5005_Spy0425                                   |             | <b>1.9</b>  | Glycosyltransferase involved in cell envelope biogenesis                |
| M5005_Spy0426                                   |             | <b>1.9</b>  | Glycosyltransferase involved in cell envelope biogenesis                |
| <b>Energy production and conversion</b>         |             |             |                                                                         |
| M5005_Spy0125                                   |             | <b>6.3</b>  | Hypothetical ATP synthase subunit G                                     |
| <b>Function unknown</b>                         |             |             |                                                                         |
| M5005_Spy0122                                   |             | <b>1.6</b>  | PAS and HTH domains containing protein                                  |
| M5005_Spy0529                                   |             | <b>1.6</b>  | Uncharacterized Fe-S protein                                            |
| M5005_Spy1197                                   |             | <b>2.3</b>  | Hypothetical highly conserved Streptococcal and related phage proteins  |
| M5005_Spy1362                                   |             | <b>2.5</b>  | Glyco_hydro_100 superfamily; putative hydrolase                         |
| M5005_Spy1650                                   | <i>degV</i> | <b>1.8</b>  | Uncharacterized protein containing a bound fatty acid molecule          |
| M5005_Spy1828                                   |             | <b>39.5</b> | Membrane protein/Phage receptor in <i>L. lactis</i>                     |
| <b>Hypothetical proteins</b>                    |             |             |                                                                         |
| M5005_Spy0123                                   |             | <b>11.9</b> | Hypothetical protein                                                    |
| M5005_Spy0477                                   |             | <b>1.7</b>  | Hypothetical protein                                                    |
| M5005_Spy0754                                   |             | <b>2.4</b>  | Hypothetical protein                                                    |
| M5005_Spy0911                                   |             | <b>1.5</b>  | Hypothetical protein                                                    |
| M5005_Spy1142                                   |             | <b>3.0</b>  | Hypothetical protein/peptidase S11                                      |
| M5005_Spy1143                                   |             | <b>3.0</b>  | Hypothetical protein                                                    |
| M5005_Spy1144                                   |             | <b>3.3</b>  | Hypothetical protein                                                    |
| M5005_Spy1730                                   |             | <b>2.0</b>  | DUF4298 superfamily protein. Unknown function                           |
| M5005_Spy1823                                   |             | <b>1.5</b>  | Predicted transmembrane protein of unknown function                     |
| <b>Metabolism - Carbon</b>                      |             |             |                                                                         |
| M5005_Spy0528                                   |             | <b>1.6</b>  | Putative phosphohexomutase                                              |
| M5005_Spy0751                                   | <i>acoA</i> | <b>2.5</b>  | Pyruvate dehydrogenase E1 component, alpha subunit                      |
| M5005_Spy0752                                   | <i>acoB</i> | <b>2.5</b>  | Pyruvate dehydrogenase E1 component, beta subunit                       |
| M5005_Spy0753                                   | <i>acoC</i> | <b>2.4</b>  | Pyruvate dehydrogenase, dihydrolipoamide acyltransferase (E2) component |
| M5005_Spy0755                                   | <i>acoL</i> | <b>2.4</b>  | Pyruvate dehydrogenase, dihydrolipoamide dehydrogenase (E3) component   |
| M5005_Spy1538                                   | <i>pmi</i>  | <b>1.6</b>  | Mannose-6-phosphate isomerase.                                          |
| M5005_Spy1841                                   | <i>sdhB</i> | <b>6.3</b>  | Serine dehydratase beta chain                                           |
| M5005_Spy1842                                   | <i>sdhA</i> | <b>6.0</b>  | Serine dehydratase alpha chain                                          |
| <b>Metabolism - Lipids</b>                      |             |             |                                                                         |
| M5005_Spy0879                                   | <i>dgk</i>  | <b>3.5</b>  | Diacylglycerol kinase (DAG)                                             |

|                                             |             |            |                                                                |
|---------------------------------------------|-------------|------------|----------------------------------------------------------------|
| M5005_Spy1484                               | <i>accD</i> | <b>6.7</b> | Acetyl-CoA carboxylase subunit                                 |
| M5005_Spy1485                               | <i>accA</i> | <b>6.5</b> | Acetyl-CoA carboxylase subunit                                 |
| M5005_Spy1486                               | <i>accC</i> | <b>6.2</b> | Acetyl-CoA carboxylase subunit                                 |
| M5005_Spy1487                               | <i>fabZ</i> | <b>6.3</b> | Beta-hydroxyacyl-ACP dehydrase                                 |
| M5005_Spy1488                               | <i>accB</i> | <b>6.5</b> | Acetyl-CoA carboxylase subunit                                 |
| M5005_Spy1489                               | <i>fabF</i> | <b>6.3</b> | Beta-ketoacyl-ACP synthase II (KAS II)                         |
| M5005_Spy1490                               | <i>fabG</i> | <b>6.4</b> | Beta-ketoacyl-ACP reductase                                    |
| M5005_Spy1491                               | <i>fabD</i> | <b>6.3</b> | Malonyl-CoA:ACP-transacylase                                   |
| M5005_Spy1492                               | <i>fabK</i> | <b>6.0</b> | Enoyl-ACP reductase II                                         |
| M5005_Spy1496                               | <i>phaB</i> | <b>1.7</b> | Enoyl-CoA hydratase                                            |
| <b>Metabolism - Coenzymes and cofactors</b> |             |            |                                                                |
| M5005_Spy0945                               | <i>coaA</i> | <b>1.8</b> | Pantothenate kinase; coenzyme A (CoA) biosynthetic pathway     |
| <b>Metabolism - Fermentation pathways</b>   |             |            |                                                                |
| M5005_Spy1569                               | <i>pfl</i>  | <b>1.8</b> | Pyruvate formate lyase                                         |
| <b>Nucleotide metabolism and transport</b>  |             |            |                                                                |
| M5005_Spy0012                               | <i>hpt</i>  | <b>1.6</b> | Hypoxanthine phosphoribosyl transferase                        |
| <b>Other</b>                                |             |            |                                                                |
| M5005_Spy1809                               | <i>uviB</i> | <b>1.8</b> | Enterocin A Immunity ; it protects from bacteriocidal activity |
| <b>Phage proteins</b>                       |             |            |                                                                |
| M5005_Spy1045                               |             | <b>2.8</b> | Phage protein                                                  |
| M5005_Spy1417                               |             | <b>3.5</b> | Lambdoid phage 5005.3 protein                                  |
| M5005_Spy1419                               |             | <b>2.4</b> | Lambdoid phage 5005.3 protein                                  |
| M5005_Spy1420                               |             | <b>2.7</b> | Lambdoid phage 5005.3 protein                                  |
| M5005_Spy1422                               |             | <b>2.6</b> | Lambdoid phage 5005.3 protein                                  |
| M5005_Spy1423                               |             | <b>2.9</b> | Lambdoid phage 5005.3 protein                                  |
| M5005_Spy1424                               |             | <b>2.6</b> | Lambdoid phage 5005.3 protein                                  |
| M5005_Spy1425                               |             | <b>3.0</b> | Lambdoid phage 5005.3 protein                                  |
| M5005_Spy1426                               |             | <b>2.9</b> | Lambdoid phage 5005.3 protein                                  |
| M5005_Spy1427                               |             | <b>2.9</b> | Lambdoid phage 5005.3 protein                                  |
| M5005_Spy1428                               |             | <b>3.1</b> | Lambdoid phage 5005.3 protein                                  |
| M5005_Spy1429                               |             | <b>3.2</b> | Lambdoid phage 5005.3 protein                                  |
| M5005_Spy1430                               |             | <b>2.8</b> | Lambdoid phage 5005.3 protein                                  |
| M5005_Spy1431                               |             | <b>2.4</b> | Lambdoid phage 5005.3 protein                                  |
| M5005_Spy1432                               |             | <b>2.9</b> | Lambdoid phage 5005.3 protein                                  |
| M5005_Spy1433                               |             | <b>2.6</b> | Lambdoid phage 5005.3 protein                                  |
| M5005_Spy1434                               |             | <b>2.9</b> | Lambdoid phage 5005.3 protein                                  |
| M5005_Spy1435                               |             | <b>2.5</b> | Lambdoid phage 5005.3 protein                                  |
| M5005_Spy1437                               |             | <b>2.2</b> | Lambdoid phage 5005.3 protein                                  |
| M5005_Spy1441                               |             | <b>2.6</b> | Lambdoid phage 5005.3 protein                                  |
| M5005_Spy1445                               |             | <b>3.4</b> | Lambdoid phage 5005.3 protein                                  |
| M5005_Spy1448                               |             | <b>3.6</b> | Lambdoid phage 5005.3 protein                                  |
| M5005_Spy1450                               |             | <b>2.9</b> | Lambdoid phage 5005.3 protein                                  |

|                                                                     |              |             |                                                                               |
|---------------------------------------------------------------------|--------------|-------------|-------------------------------------------------------------------------------|
| M5005_Spy1451                                                       |              | <b>3.2</b>  | Lambdoid phage 5005.3 protein                                                 |
| M5005_Spy1452                                                       |              | <b>3.0</b>  | Lambdoid phage 5005.3 protein                                                 |
| M5005_Spy1453                                                       |              | <b>3.1</b>  | Lambdoid phage 5005.3 protein                                                 |
| M5005_Spy1454                                                       |              | <b>2.7</b>  | Lambdoid phage 5005.3 protein                                                 |
| M5005_Spy1455                                                       |              | <b>2.0</b>  | Lambdoid phage 5005.3 protein                                                 |
| M5005_Spy1456                                                       |              | <b>2.2</b>  | Lambdoid phage 5005.3 protein                                                 |
| M5005_Spy1457                                                       |              | <b>2.5</b>  | Lambdoid phage 5005.3 protein                                                 |
| M5005_Spy1458                                                       |              | <b>2.5</b>  | Lambdoid phage 5005.3 protein                                                 |
| M5005_Spy1460                                                       |              | <b>3.2</b>  | Lambdoid phage 5005.3 protein                                                 |
| M5005_Spy1461                                                       |              | <b>3.1</b>  | Lambdoid phage 5005.3 protein                                                 |
| <b>Posttranslational modification, protein turnover, chaperones</b> |              |             |                                                                               |
| M5005_Spy0739                                                       |              | <b>1.6</b>  | Protein involved in chaperone, transcription, and protein transport complexes |
| M5005_Spy1114                                                       |              | <b>1.5</b>  | Membrane proteinase, regulator of anti-sigma factor                           |
| M5005_Spy1356                                                       | <i>pepC</i>  | <b>1.7</b>  | Aminopeptidase C                                                              |
| M5005_Spy1577                                                       | <i>pepXP</i> | <b>1.6</b>  | Aminopeptidase                                                                |
| M5005_Spy1782                                                       | <i>pepO</i>  | <b>1.6</b>  | Predicted metalloendopeptidase                                                |
| <b>Replication, repair and cell division</b>                        |              |             |                                                                               |
| M5005_Spy0011                                                       | <i>tilS</i>  | <b>1.7</b>  | Predicted ATPase of the PP-loop family implicated in cell cycle control       |
| M5005_Spy0013                                                       | <i>ftsH</i>  | <b>1.6</b>  | ATP-dependent zinc metalloprotease                                            |
| M5005_Spy0339                                                       | <i>exoA</i>  | <b>1.6</b>  | Exonuclease III                                                               |
| M5005_Spy0387                                                       |              | <b>1.6</b>  | Uracil-DNA glycosylases (UDG); base excision repair pathway                   |
| M5005_Spy0737                                                       | <i>mutX</i>  | <b>1.6</b>  | MutT homolog. It might hydrolyze oxidized purine nucleoside triphosphates     |
| M5005_Spy1075                                                       | <i>uvrB</i>  | <b>1.5</b>  | excinuclease ABC, B subunit                                                   |
| M5005_Spy1320                                                       | <i>recX</i>  | <b>1.8</b>  | Regulator of recombination                                                    |
| <b>General stress</b>                                               |              |             |                                                                               |
| M5005_Spy0386                                                       | <i>phoH</i>  | <b>1.6</b>  | PhoH-like protein; PhoH is induced by phosphate starvation                    |
| M5005_Spy1328                                                       |              | <b>1.5</b>  | IMPACT family protein involved in response to stress                          |
| M5005_Spy1769                                                       | <i>ahpF</i>  | <b>1.8</b>  | Alkyl hydroperoxide reductase, subunit F. Role in oxidative stress defense    |
| <b>Transcription</b>                                                |              |             |                                                                               |
| M5005_Spy0124                                                       | <i>sloR</i>  | <b>10.2</b> | Transcriptional regulator. PTS EIIC superfamily                               |
| M5005_Spy0483                                                       |              | <b>2.1</b>  | Putative stress-responsive transcriptional regulator                          |
| M5005_Spy0881                                                       |              | <b>6.4</b>  | Transcription regulator; MerR family                                          |
| M5005_Spy1576                                                       | <i>srv</i>   | <b>1.6</b>  | GntR family of transcriptional regulators. cAMP-binding protein               |
| M5005_Spy1589                                                       | <i>crgR</i>  | <b>1.6</b>  | Transcriptional regulator, GntR family                                        |
| M5005_Spy1798                                                       | <i>spxA</i>  | <b>3.1</b>  | Transcriptional regulator                                                     |
| M5005_Spy1830                                                       |              | <b>2.3</b>  | Transcriptional regulator                                                     |
| <b>Transport</b>                                                    |              |             |                                                                               |
| M5005_Spy0270                                                       | <i>atmA</i>  | <b>2.0</b>  | ABC transporter substrate binding domain                                      |
| M5005_Spy0478                                                       |              | <b>1.7</b>  | Putative permease                                                             |
| M5005_Spy0738                                                       |              | <b>1.6</b>  | Putative permease; pheromone autoinducer 2 (AI-2) transporter                 |
| M5005_Spy1363                                                       |              | <b>2.8</b>  | ABC transporter trans-membrane subunit                                        |
| <b>Virulence</b>                                                    |              |             |                                                                               |

|               |               |            |                                                                   |
|---------------|---------------|------------|-------------------------------------------------------------------|
| M5005_Spy0385 |               | <b>5.4</b> | Acute rheumatic fever streptococcal myosin cross-reactive protein |
| M5005_Spy0880 | <i>hlyIII</i> | <b>5.3</b> | Hemolysin III-related/erythrocyte lysis                           |
| M5005_Spy1106 | <i>grab</i>   | <b>1.9</b> | Protein G-related alpha 2 macroglobulin-binding protein (GRAB)    |
| M5005_Spy1737 | <i>ropB</i>   | <b>1.7</b> | Transcriptional activator, Rgg/GadR/MutR family                   |

## B. Down-regulated genes during mid-exponential phase

| Locus tag                                       | Gene         | Fold change  | Function                                                    |
|-------------------------------------------------|--------------|--------------|-------------------------------------------------------------|
| <b>Amino acid metabolism and transport</b>      |              |              |                                                             |
| M5005_Spy0014                                   |              | <b>-1.7</b>  | Putative amino acid transporter                             |
| M5005_Spy0659                                   | <i>apbA</i>  | <b>-1.7</b>  | Putative ketopantoate reductase                             |
| M5005_Spy1270                                   | <i>arcC</i>  | <b>-11.5</b> | Carbamate kinase; arginine deiminase pathway                |
| M5005_Spy1271                                   |              | <b>-11.4</b> | Acetyl ornithine deacetylase; arginine deiminase pathway    |
| M5005_Spy1272                                   | <i>arcD</i>  | <b>-11.9</b> | Putative permease; arginine deiminase pathway               |
| M5005_Spy1273                                   | <i>arcB</i>  | <b>-10.2</b> | Ornithine carbamoyl transferase; arginine deiminase pathway |
| M5005_Spy1274                                   |              | <b>-12.0</b> | Acetyl transferase; arginine deiminase pathway              |
| M5005_Spy1275                                   | <i>arcA</i>  | <b>-11.3</b> | Arginine deiminase; arginine deiminase pathway              |
| M5005_Spy1297                                   | <i>aroA2</i> | <b>-1.8</b>  | 3-deoxy-D-arabino-heptulosonate 7-phosphate (DAHP) synthase |
| M5005_Spy1298                                   | <i>aroB</i>  | <b>-1.8</b>  | 3-dehydroquinase synthetase                                 |
| <b>Cell wall, membrane, envelope biogenesis</b> |              |              |                                                             |
| M5005_Spy0017                                   | <i>sibA</i>  | <b>-1.7</b>  | Putative amidase                                            |
| M5005_Spy0705                                   | <i>amiC</i>  | <b>-2.3</b>  | Amidase                                                     |
| <b>DNA processing and metabolism</b>            |              |              |                                                             |
| M5005_Spy1137                                   | <i>coiA</i>  | <b>-1.8</b>  | Competence protein                                          |
| M5005_Spy1169                                   | <i>spd3</i>  | <b>-1.9</b>  | DNA/RNA non-specific endonuclease                           |
| <b>Function unknown</b>                         |              |              |                                                             |
| M5005_Spy0944                                   |              | <b>-2.0</b>  | Putative S-adenosylmethionine-dependent methyltransferase   |
| M5005_Spy1276                                   |              | <b>-1.7</b>  | Putative cAMP-binding protein                               |
| M5005_Spy1387                                   |              | <b>-1.6</b>  | Predicted oxidoreductase                                    |
| M5005_Spy1407                                   |              | <b>-2.0</b>  | Putative esterase/lipase                                    |
| M5005_Spy1530                                   |              | <b>-2.1</b>  | Cell surface protein with leucine-rich repeats              |
| M5005_Spy1691                                   |              | <b>-2.7</b>  | endonuclease/exonuclease/phosphatase family protein         |
| M5005_Spy1843                                   |              | <b>-2.5</b>  | Putative transglycosylase                                   |
| <b>Hypothetical proteins</b>                    |              |              |                                                             |
| M5005_Spy0015                                   |              | <b>-3.1</b>  | Hypothetical protein                                        |
| M5005_Spy0072                                   |              | <b>-2.8</b>  | Hypothetical protein                                        |
| M5005_Spy0073                                   |              | <b>-1.9</b>  | Hypothetical protein                                        |
| M5005_Spy0255                                   |              | <b>-2.7</b>  | Hypothetical protein                                        |
| M5005_Spy0651                                   |              | <b>-1.7</b>  | Conserved protein with leucine-rich repeats                 |
| M5005_Spy0852                                   |              | <b>-1.5</b>  | Hypothetical protein                                        |
| M5005_Spy0904                                   |              | <b>-2.6</b>  | Hypothetical membrane protein                               |

|               |  |             |                                                            |
|---------------|--|-------------|------------------------------------------------------------|
| M5005_Spy1170 |  | <b>-1.7</b> | Hypothetical membrane protein                              |
| M5005_Spy1324 |  | <b>-2.5</b> | Hypothetical protein                                       |
| M5005_Spy1413 |  | <b>-1.5</b> | Hypothetical protein                                       |
| M5005_Spy1619 |  | <b>-2.7</b> | Hypothetical protein                                       |
| M5005_Spy1714 |  | <b>-1.8</b> | Hypothetical cell surface protein                          |
| M5005_Spy1759 |  | <b>-2.3</b> | Hypothetical protein; member of the Nudix hydrolase family |
| M5005_Spy1827 |  | <b>-1.9</b> | Hypothetical membrane protein                              |
| M5005_Spy1860 |  | <b>-1.9</b> | Hypothetical membrane protein                              |

#### Inorganic ion transport and metabolism

|               |             |             |                                      |
|---------------|-------------|-------------|--------------------------------------|
| M5005_Spy0653 | <i>czcD</i> | <b>-1.8</b> | Co/Zn/Cd efflux system component     |
| M5005_Spy1161 | <i>focA</i> | <b>-1.7</b> | Putative formate transporter         |
| M5005_Spy1167 |             | <b>-1.9</b> | Putative cation transport ATPase     |
| M5005_Spy1405 | <i>copA</i> | <b>-3.1</b> | Cation transporter ATPase            |
| M5005_Spy1406 | <i>copY</i> | <b>-1.9</b> | Copper transport repressor           |
| M5005_Spy1575 | <i>norA</i> | <b>-2.8</b> | Uncharacterized MFS-type transporter |

#### Metabolism - Carbon

|               |               |             |                                                                             |
|---------------|---------------|-------------|-----------------------------------------------------------------------------|
| M5005_Spy0505 | <i>ppc</i>    | <b>-2.3</b> | PEP carboxylase                                                             |
| M5005_Spy0903 | <i>oadB</i>   | <b>-2.4</b> | Oxaloacetate decarboxylase beta subunit                                     |
| M5005_Spy0908 | <i>citX</i>   | <b>-2.4</b> | Citrate lyase subunit                                                       |
| M5005_Spy1119 | <i>gapN</i>   | <b>-2.6</b> | NADP-dependent glyceraldehyde-3-phosphate dehydrogenase                     |
| M5005_Spy1139 | <i>nagB</i>   | <b>-2.2</b> | Putative glucosamine-6-phosphate deaminase                                  |
| M5005_Spy1388 | <i>nagA</i>   | <b>-1.6</b> | Putative N-acetylglucosamine-6-phosphate deacetylase                        |
| M5005_Spy1395 | <i>lacD.1</i> | <b>-3.3</b> | Tagatose-6-phosphate aldolase; Lac.1 (cluster I) tagatose pathway           |
| M5005_Spy1396 | <i>lacC.1</i> | <b>-5.9</b> | Tagatose-6-phosphate kinase; Lac.1 (cluster I) tagatose pathway             |
| M5005_Spy1397 | <i>lacB.1</i> | <b>-4.8</b> | Galactose-6-phosphate isomerase subunit; Lac.1 (cluster I) tagatose pathway |
| M5005_Spy1398 | <i>lacA.1</i> | <b>-4.3</b> | Galactose-6-phosphate isomerase subunit; Lac.1 (cluster I) tagatose pathway |
| M5005_Spy1681 | <i>dexB</i>   | <b>-2.3</b> | Glucan 1,6-alpha-glucosidase                                                |
| M5005_Spy1783 | <i>dexS</i>   | <b>-3.7</b> | Putative alpha amylase/glycosidase                                          |

#### Metabolism - Coenzymes and cofactors

|               |  |             |                                   |
|---------------|--|-------------|-----------------------------------|
| M5005_Spy0652 |  | <b>-1.8</b> | Pyridoxamine 5'-phosphate oxidase |
|---------------|--|-------------|-----------------------------------|

#### Metabolism - Fermentation pathways

|               |             |             |                                          |
|---------------|-------------|-------------|------------------------------------------|
| M5005_Spy0039 | <i>adh2</i> | <b>-4.3</b> | Acetaldehyde dehydrogenase               |
| M5005_Spy0040 | <i>adhA</i> | <b>-3.5</b> | Alcohol dehydrogenase                    |
| M5005_Spy1749 | <i>pfIC</i> | <b>-1.5</b> | Pyruvate formate lyase activating enzyme |

#### Nucleotide metabolism and transport

|               |             |             |                                                                                  |
|---------------|-------------|-------------|----------------------------------------------------------------------------------|
| M5005_Spy0029 | <i>purD</i> | <b>-1.7</b> | Phosphoribosylglycinamide synthetase involved in <i>de novo</i> purine synthesis |
| M5005_Spy0136 | <i>purA</i> | <b>-1.6</b> | Adenylosuccinate synthetase involved in <i>de novo</i> purine synthesis          |
| M5005_Spy0641 | <i>pyrB</i> | <b>-2.7</b> | Aspartate carbamoyl transferase                                                  |
| M5005_Spy0642 | <i>carA</i> | <b>-2.6</b> | Carbamoyl phosphate synthase small subunit                                       |
| M5005_Spy0643 | <i>carB</i> | <b>-2.5</b> | Carbamoyl phosphate synthase large subunit                                       |
| M5005_Spy0703 | <i>pyrF</i> | <b>-3.7</b> | Orotidine 5-phosphate decarboxylase                                              |
| M5005_Spy0704 | <i>pyrE</i> | <b>-3.6</b> | Orotate phosphoribosyltransferase                                                |

|                                                                     |                |             |                                                                           |
|---------------------------------------------------------------------|----------------|-------------|---------------------------------------------------------------------------|
| M5005_Spy0857                                                       | <i>guaC</i>    | <b>-2.9</b> | Putative guanosine monophosphate reductase                                |
| <b>Phage proteins</b>                                               |                |             |                                                                           |
| M5005_Spy0913                                                       | <i>xerD</i>    | <b>-1.8</b> | Phage integrase                                                           |
| <b>Posttranslational modification, protein turnover, chaperones</b> |                |             |                                                                           |
| M5005_Spy0341                                                       | <i>prtS</i>    | <b>-3.9</b> | Peptidase                                                                 |
| M5005_Spy1715                                                       | <i>scpA</i>    | <b>-2.0</b> | Peptidase C5                                                              |
| M5005_Spy1758                                                       |                | <b>-1.7</b> | Peptidase, C69 family                                                     |
| <b>Replication, repair and cell division</b>                        |                |             |                                                                           |
| M5005_Spy1582                                                       | <i>dnaQ</i>    | <b>-2.1</b> | DNA polymerase III subunit epsilon                                        |
| <b>General stress</b>                                               |                |             |                                                                           |
| M5005_Spy1574                                                       |                | <b>-3.0</b> | Putative universal stress protein UspA                                    |
| <b>Transcription</b>                                                |                |             |                                                                           |
| M5005_Spy0155                                                       |                | <b>-1.6</b> | Putative transcriptional antiterminator                                   |
| M5005_Spy0186                                                       |                | <b>-7.2</b> | M trans-acting positive regulator (MGA) PRD domain protein                |
| M5005_Spy0639                                                       | <i>pyrR</i>    | <b>-2.8</b> | Transcriptional regulator of pyrimidine biosynthesis                      |
| M5005_Spy0914                                                       |                | <b>-1.6</b> | Putative transcriptional regulator                                        |
| M5005_Spy1581                                                       |                | <b>-2.2</b> | Putative transcriptional regulator                                        |
| M5005_Spy1747                                                       |                | <b>-1.6</b> | Transcriptional regulator                                                 |
| M5005_Spy1748                                                       |                | <b>-1.6</b> | DeoR family transcriptional regulator                                     |
| <b>Translation</b>                                                  |                |             |                                                                           |
| M5005_Spy0619                                                       | <i>infC</i>    | <b>-1.6</b> | IF-3 translation initiation factor                                        |
| M5005_Spy0620                                                       | <i>rpl36</i>   | <b>-1.6</b> | 50S ribosomal protein L35                                                 |
| M5005_Spy0621                                                       | <i>rplT</i>    | <b>-1.8</b> | 50S ribosomal protein L20                                                 |
| M5005_Spy0794                                                       | <i>thdF</i>    | <b>-1.6</b> | Putative tRNA modification GTPase                                         |
| M5005_Spy1138                                                       | <i>rsuA</i>    | <b>-1.6</b> | Putative pseudouridine synthase                                           |
| M5005_Spy1483                                                       | <i>serS</i>    | <b>-2.0</b> | Seryl-tRNA synthetase                                                     |
| <b>Transport</b>                                                    |                |             |                                                                           |
| M5005_Spy0137                                                       |                | <b>-1.5</b> | Uncharacterized ABC-type transport system membrane component              |
| M5005_Spy0324                                                       | <i>fhuA</i>    | <b>-1.6</b> | Uncharacterized ABC-type transport system                                 |
| M5005_Spy0640                                                       | <i>pyrP</i>    | <b>-2.6</b> | Putative uracyl permease                                                  |
| M5005_Spy0658                                                       |                | <b>-1.7</b> | Phosphotransferase system IIC component                                   |
| M5005_Spy0829                                                       | <i>potD</i>    | <b>-1.5</b> | Spermidine/putrescine ABC-type transport system component                 |
| M5005_Spy1058                                                       | <i>malE</i>    | <b>-2.0</b> | Putative maltose/maltodextrin transporter                                 |
| M5005_Spy1094                                                       |                | <b>-5.3</b> | Putative transport protein                                                |
| M5005_Spy1399                                                       | <i>ptsIIC</i>  | <b>-4.5</b> | PTS galactose-specific EIIC component; Lac.1 (cluster I) tagatose pathway |
| M5005_Spy1692                                                       |                | <b>-2.6</b> | PTS system glucose/maltose-specific transporter subunit IIC               |
| M5005_Spy1784                                                       |                | <b>-2.7</b> | Phosphotransferase system IIABC component                                 |
| <b>Virulence</b>                                                    |                |             |                                                                           |
| M5005_Spy0182                                                       | <i>speG</i>    | <b>-1.7</b> | SpeG exotoxin                                                             |
| M5005_Spy1415                                                       | <i>sdaD2</i>   | <b>-2.1</b> | Streptodornase                                                            |
| M5005_Spy1718                                                       | <i>sic1.01</i> | <b>-1.9</b> | Streptococcal inhibitor of complement                                     |

### C. Up-regulated genes during stationary phase

| Locus tag                                       | Gene          | Fold change | Function                                                       |
|-------------------------------------------------|---------------|-------------|----------------------------------------------------------------|
| <b>Amino acid metabolism and transport</b>      |               |             |                                                                |
| M5005_Spy0713                                   | <i>bcaT</i>   | <b>1.6</b>  | Branched-chain amino acid aminotransferase                     |
| M5005_Spy1269                                   | <i>asnA</i>   | <b>2.2</b>  | Asparagine synthetase A                                        |
| M5005_Spy1298                                   | <i>aroB</i>   | <b>1.8</b>  | 3-dehydroquinate synthetase                                    |
| M5005_Spy1359                                   |               | <b>1.5</b>  | D-alanine/D-serine/glycine permease                            |
| M5005_Spy1596                                   | <i>glnA</i>   | <b>1.8</b>  | Glutamine synthetase                                           |
| M5005_Spy1658                                   | <i>cysE</i>   | <b>2.0</b>  | Serine acetyltransferase                                       |
| <b>Cell wall, membrane, envelope biogenesis</b> |               |             |                                                                |
| M5005_Spy0247                                   | <i>pbp7</i>   | <b>1.6</b>  | D-alanyl-D-alanine carboxipeptidase                            |
| M5005_Spy0384                                   |               | <b>2.6</b>  | Putative peptidoglycan-binding protein                         |
| M5005_Spy0510                                   | <i>murN</i>   | <b>1.9</b>  | UDP-N-acetylmuramoylpentapeptide-lysine N(6)-alanyltransferase |
| M5005_Spy0511                                   | <i>murM</i>   | <b>2.0</b>  | UDP-N-acetylmuramoylpentapeptide-lysine N(6)-alanyltransferase |
| M5005_Spy0607                                   | <i>rgpE</i>   | <b>1.6</b>  | Putative glycosyl transferase                                  |
| M5005_Spy0608                                   | <i>rgpF</i>   | <b>1.6</b>  | Lipopolysaccharide biosynthesis protein                        |
| M5005_Spy0663                                   | <i>mur1.1</i> | <b>1.9</b>  | Mannosyl-glycoprotein endo-beta-N-acetylglucosaminidase        |
| M5005_Spy0686                                   | <i>mvaA</i>   | <b>2.0</b>  | HMG-CoA reductase; mevalonate pathway                          |
| M5005_Spy0687                                   | <i>mvaS.1</i> | <b>1.7</b>  | HMG-CoA synthase; mevalonate pathway                           |
| M5005_Spy0705                                   | <i>amiC</i>   | <b>5.7</b>  | Amidase                                                        |
| M5005_Spy1252                                   | <i>murG</i>   | <b>1.6</b>  | Peptidoglycan synthesis protein                                |
| M5005_Spy1253                                   | <i>murD</i>   | <b>1.6</b>  | Peptidoglycan synthesis protein                                |
| <b>DNA processing and metabolism</b>            |               |             |                                                                |
| M5005_Spy0002                                   | <i>dnaN</i>   | <b>1.5</b>  | DNA polymerase III beta subunit                                |
| M5005_Spy0712                                   | <i>parC</i>   | <b>1.6</b>  | DNA topoisomerase IV subunit A                                 |
| M5005_Spy1228                                   | <i>recN</i>   | <b>1.5</b>  | DNA repair protein                                             |
| M5005_Spy1232                                   | <i>xseB</i>   | <b>1.5</b>  | Exonuclease VII small subunit                                  |
| M5005_Spy1804                                   | <i>mutL</i>   | <b>1.5</b>  | DNA mismatch repair protein                                    |
| <b>Energy production and conversion</b>         |               |             |                                                                |
| M5005_Spy0579                                   | <i>atpA</i>   | <b>2.3</b>  | F0F1 ATP synthase alpha subunit                                |
| M5005_Spy0580                                   | <i>atpG</i>   | <b>2.3</b>  | F0F1 ATP synthase gamma subunit                                |
| M5005_Spy0581                                   | <i>atpD</i>   | <b>2.2</b>  | F0F1 ATP synthase beta subunit                                 |
| M5005_Spy0582                                   | <i>atpC</i>   | <b>2.0</b>  | F0F1 ATP synthase delta subunit                                |
| <b>Function unknown</b>                         |               |             |                                                                |
| M5005_Spy0080                                   |               | <b>2.6</b>  | Histidine triad (HIT) protein                                  |
| M5005_Spy0209                                   |               | <b>1.7</b>  | Protein predicted to bind ssDNA or ssRNA                       |
| M5005_Spy0360                                   |               | <b>1.5</b>  | Predicted dehydrogenase                                        |
| M5005_Spy0512                                   |               | <b>1.9</b>  | Putative phosphatase/hydrolase                                 |
| M5005_Spy0610                                   |               | <b>1.6</b>  | Putative glycosyl transferase                                  |
| M5005_Spy1248                                   |               | <b>1.9</b>  | Putative pyridoxal phosphate enzyme                            |
| M5005_Spy1362                                   |               | <b>1.6</b>  | Invertase; a hydrolase                                         |



|               |             |             |                                                                      |
|---------------|-------------|-------------|----------------------------------------------------------------------|
| M5005_Spy1601 |             | <b>1.7</b>  | Band 7-domain protein. It may cluster to form membrane micro-domains |
| M5005_Spy1650 | <i>degV</i> | <b>2.8</b>  | Uncharacterized protein containing a bound fatty acid molecule       |
| M5005_Spy1654 |             | <b>2.1</b>  | Putative ribonuclease                                                |
| M5005_Spy1828 |             | <b>36.7</b> | Membrane protein/Phage receptor in <i>L. lactis</i>                  |

#### Hypothetical proteins

|               |  |            |                                                      |
|---------------|--|------------|------------------------------------------------------|
| M5005_Spy0383 |  | <b>2.5</b> | Hypothetical protein                                 |
| M5005_Spy0651 |  | <b>1.9</b> | Hypothetical protein containing leucine-rich repeats |
| M5005_Spy0744 |  | <b>2.7</b> | Hypothetical protein                                 |
| M5005_Spy0963 |  | <b>1.7</b> | Putative membrane protein                            |
| M5005_Spy1095 |  | <b>1.8</b> | Hypothetical protein                                 |
| M5005_Spy1141 |  | <b>2.0</b> | Hypothetical protein                                 |
| M5005_Spy1162 |  | <b>1.5</b> | Hypothetical membrane protein                        |
| M5005_Spy1247 |  | <b>1.8</b> | Hypothetical protein                                 |
| M5005_Spy1383 |  | <b>1.6</b> | Hypothetical protein                                 |
| M5005_Spy1517 |  | <b>1.8</b> | Hypothetical protein                                 |
| M5005_Spy1552 |  | <b>2.4</b> | Hypothetical membrane protein                        |
| M5005_Spy1653 |  | <b>1.7</b> | Hypothetical protein                                 |
| M5005_Spy1656 |  | <b>1.9</b> | Hypothetical protein                                 |
| M5005_Spy1657 |  | <b>1.8</b> | Hypothetical protein                                 |
| M5005_Spy1659 |  | <b>2.1</b> | Hypothetical protein                                 |

#### Inorganic ion transport and metabolism

|               |              |            |                                                                                                              |
|---------------|--------------|------------|--------------------------------------------------------------------------------------------------------------|
| M5005_Spy0321 | <i>fhuG</i>  | <b>1.9</b> | Iron transporter                                                                                             |
| M5005_Spy0322 | <i>fhuB</i>  | <b>2.1</b> | Iron transporter                                                                                             |
| M5005_Spy0323 | <i>fhuD</i>  | <b>2.5</b> | Iron transporter                                                                                             |
| M5005_Spy0653 | <i>czcD</i>  | <b>1.7</b> | Co/Zn/Cd efflux system component                                                                             |
| M5005_Spy0950 | <i>phoU</i>  | <b>1.6</b> | Putative phosphate regulatory protein                                                                        |
| M5005_Spy0952 | <i>pstB2</i> | <b>1.8</b> | ATP-binding cassette domain of the phosphate transport system                                                |
| M5005_Spy0953 | <i>pstA</i>  | <b>1.8</b> | Phosphate transporter ATP-binding protein                                                                    |
| M5005_Spy0954 | <i>pstC</i>  | <b>2.2</b> | Phosphate transporter permease subunit PstC                                                                  |
| M5005_Spy0955 | <i>pstS</i>  | <b>1.5</b> | Phosphate ABC transporter substrate-binding protein PstS                                                     |
| M5005_Spy1094 |              | <b>7.8</b> | Putative transporter of the Major Facilitator Superfamily (MFS)                                              |
| M5005_Spy1551 | <i>corA</i>  | <b>1.8</b> | Membrane transporter of divalent cations, such as Mg <sup>2+</sup> , Co <sup>2+</sup> , and Ni <sup>2+</sup> |

#### Metabolism

|               |               |            |                                |
|---------------|---------------|------------|--------------------------------|
| M5005_Spy0382 | <i>msrA.2</i> | <b>2.0</b> | Methionine sulfoxide reductase |
|---------------|---------------|------------|--------------------------------|

#### Metabolism - Carbon

|               |             |            |                       |
|---------------|-------------|------------|-----------------------|
| M5005_Spy0661 | <i>fruB</i> | <b>3.3</b> | 1-phosphofructokinase |
| M5005_Spy0938 | <i>pgmA</i> | <b>1.6</b> | Phosphoglucomutase    |

#### Metabolism - Lipids

|               |             |             |                                |
|---------------|-------------|-------------|--------------------------------|
| M5005_Spy0879 | <i>dgk</i>  | <b>9.7</b>  | Diacylglycerol (DAG) kinase    |
| M5005_Spy1484 | <i>accD</i> | <b>17.1</b> | Acetyl-CoA carboxylase subunit |
| M5005_Spy1485 | <i>accA</i> | <b>18.0</b> | Acetyl-CoA carboxylase subunit |
| M5005_Spy1486 | <i>accC</i> | <b>18.7</b> | Acetyl-CoA carboxylase subunit |

|                                             |             |             |                                                              |
|---------------------------------------------|-------------|-------------|--------------------------------------------------------------|
| M5005_Spy1487                               | <i>fabZ</i> | <b>18.1</b> | Beta-hydroxyacyl-ACP dehydrase                               |
| M5005_Spy1488                               | <i>accB</i> | <b>19.0</b> | Acetyl-CoA carboxylase subunit                               |
| M5005_Spy1489                               | <i>fabF</i> | <b>20.1</b> | Beta-ketoacyl-ACP synthase II (KAS II)                       |
| M5005_Spy1490                               | <i>fabG</i> | <b>20.0</b> | Beta-ketoacyl-ACP reductase                                  |
| M5005_Spy1491                               | <i>fabD</i> | <b>19.5</b> | Malonyl-CoA:ACP-transacylase                                 |
| M5005_Spy1492                               | <i>fabK</i> | <b>18.7</b> | Enoyl-ACP reductase II                                       |
| M5005_Spy1493                               | <i>acpP</i> | <b>8.8</b>  | Acyl carrier protein (ACP)                                   |
| M5005_Spy1494                               | <i>fabH</i> | <b>9.0</b>  | Beta-ketoacyl-ACP synthase III (KAS III)                     |
| M5005_Spy1496                               | <i>phaB</i> | <b>3.1</b>  | Enoyl-CoA hydratase                                          |
| <b>Metabolism - Coenzymes and cofactors</b> |             |             |                                                              |
| M5005_Spy0631                               | <i>thil</i> | <b>1.5</b>  | Thiamine biosynthesis protein                                |
| M5005_Spy0652                               |             | <b>2.0</b>  | Putative pyridoxine 5'-phosphate (PNP) oxidase               |
| M5005_Spy0960                               | <i>mreA</i> | <b>1.6</b>  | FAD/FMN synthetase                                           |
| M5005_Spy1357                               | <i>nadE</i> | <b>1.6</b>  | NAD synthetase                                               |
| <b>Metabolism - Fermentation pathways</b>   |             |             |                                                              |
| M5005_Spy0873                               | <i>ldh</i>  | <b>2.3</b>  | L-Lactate dehydrogenase                                      |
| <b>Nucleotide metabolism and transport</b>  |             |             |                                                              |
| M5005_Spy0639                               | <i>pyrR</i> | <b>4.5</b>  | Protein containing a phosphoribosyl transferase (PRT) domain |
| M5005_Spy0640                               | <i>pyrP</i> | <b>5.4</b>  | Pyrimidine permease                                          |
| M5005_Spy0641                               | <i>pyrB</i> | <b>5.9</b>  | Aspartate/ornithine carbamoyl transferase                    |
| M5005_Spy0642                               | <i>carA</i> | <b>6.2</b>  | Carbamoyl phosphate synthase small subunit                   |
| M5005_Spy0643                               | <i>carB</i> | <b>6.1</b>  | Carbamoyl phosphate synthase large subunit                   |
| M5005_Spy0703                               | <i>pyrF</i> | <b>8.1</b>  | Orotidine-5-P decarboxylase                                  |
| M5005_Spy0704                               | <i>pyrE</i> | <b>8.5</b>  | Phosphoribosyl transferase                                   |
| M5005_Spy1515                               |             | <b>2.2</b>  | Nucleoside Triphosphate Pyrophosphohydrolase                 |
| M5005_Spy1857                               | <i>guaB</i> | <b>1.9</b>  | IMP dehydrogenase/GMP reductase                              |
| <b>Phage proteins</b>                       |             |             |                                                              |
| M5005_Spy1041                               |             | <b>3.9</b>  | Hypothetical phage protein                                   |
| M5005_Spy1427                               |             | <b>2.7</b>  | Hypothetical phage protein                                   |
| M5005_Spy1447                               |             | <b>2.6</b>  | Phage protein. Superfamily II DNA/RNA helicases              |
| M5005_Spy1448                               |             | <b>2.6</b>  | Putative phage nuclease                                      |
| M5005_Spy1449                               |             | <b>2.1</b>  | Phage associated DNA primase                                 |
| M5005_Spy1450                               |             | <b>2.1</b>  | Phage associated DNA_Pol_A superfamily                       |
| M5005_Spy1451                               |             | <b>2.0</b>  | Phage protein                                                |
| M5005_Spy1452                               |             | <b>2.1</b>  | Hypothetical phage protein                                   |
| M5005_Spy1453                               |             | <b>2.1</b>  | CRISPR/Cas system-associated protein Cas4                    |
| M5005_Spy1454                               |             | <b>2.1</b>  | Hypothetical phage protein                                   |
| M5005_Spy1455                               |             | <b>2.0</b>  | Hypothetical phage protein                                   |
| M5005_Spy1456                               |             | <b>2.4</b>  | Hypothetical phage protein                                   |
| M5005_Spy1458                               |             | <b>2.4</b>  | Hypothetical phage protein                                   |
| M5005_Spy1459                               |             | <b>2.4</b>  | Hypothetical phage protein                                   |
| M5005_Spy1460                               |             | <b>2.6</b>  | Hypothetical DNA-binding phage protein                       |

|                                                                     |              |            |                                                           |
|---------------------------------------------------------------------|--------------|------------|-----------------------------------------------------------|
| M5005_Spy1461                                                       |              | <b>2.7</b> | Hypothetical phage protein                                |
| M5005_Spy1462                                                       |              | <b>1.8</b> | Hypothetical phage protein                                |
| M5005_Spy1463                                                       |              | <b>2.6</b> | Hypothetical phage protein                                |
| <b>Posttranslational modification, protein turnover, chaperones</b> |              |            |                                                           |
| M5005_Spy0417                                                       | <i>pcp</i>   | <b>1.6</b> | Pyrrolidone-carboxylate peptidase                         |
| M5005_Spy1133                                                       | <i>prsA</i>  | <b>2.0</b> | Putative foldase                                          |
| M5005_Spy1227                                                       |              | <b>1.6</b> | Putative peptidase                                        |
| M5005_Spy1331                                                       |              | <b>1.5</b> | Cyclophilin-type peptidylprolyl cis- trans isomerase      |
| M5005_Spy1577                                                       | <i>pepXP</i> | <b>2.2</b> | X-Prolyl dipeptidyl aminopeptidase                        |
| M5005_Spy1782                                                       | <i>pepO</i>  | <b>1.7</b> | Predicted metalloendopeptidase                            |
| <b>Replication, repair and cell division</b>                        |              |            |                                                           |
| M5005_Spy0893                                                       | <i>gid</i>   | <b>1.6</b> | Glucose inhibited division protein                        |
| M5005_Spy1249                                                       | <i>ftsZ</i>  | <b>1.7</b> | Cell division protein                                     |
| <b>General stress</b>                                               |              |            |                                                           |
| M5005_Spy1255                                                       | <i>typA</i>  | <b>1.7</b> | Predicted membrane GTPase involved in stress response     |
| <b>Transcription</b>                                                |              |            |                                                           |
| M5005_Spy0155                                                       |              | <b>1.9</b> | Transcriptional antiterminator with PTS regulation domain |
| M5005_Spy0660                                                       | <i>fruR</i>  | <b>4.4</b> | Transcriptional regulator of sugar metabolism             |
| M5005_Spy0881                                                       |              | <b>7.5</b> | MerR-type transcription regulator                         |
| M5005_Spy1229                                                       | <i>argR1</i> | <b>1.7</b> | Arginine repressor                                        |
| M5005_Spy1686                                                       | <i>relA</i>  | <b>1.7</b> | (p)ppGpp synthetase                                       |
| <b>Translation</b>                                                  |              |            |                                                           |
| M5005_Spy0045                                                       | <i>rplD</i>  | <b>1.6</b> | 50S ribosomal protein L4                                  |
| M5005_Spy0048                                                       | <i>rpsS</i>  | <b>1.7</b> | 30S ribosomal protein S19                                 |
| M5005_Spy0051                                                       | <i>rplP</i>  | <b>1.8</b> | 50S ribosomal protein L16                                 |
| M5005_Spy0052                                                       | <i>rpmC</i>  | <b>1.8</b> | 50S ribosomal protein L29                                 |
| M5005_Spy0053                                                       | <i>rpsQ</i>  | <b>1.7</b> | 30S ribosomal protein S17                                 |
| M5005_Spy0056                                                       | <i>rplE</i>  | <b>1.8</b> | 50S ribosomal protein L5                                  |
| M5005_Spy0058                                                       | <i>rpsH</i>  | <b>2.0</b> | 30S ribosomal protein S8                                  |
| M5005_Spy0081                                                       | <i>tyrS</i>  | <b>3.2</b> | Tyrosyl tRNA synthetase                                   |
| M5005_Spy0104                                                       |              | <b>1.7</b> | Putative tRNA dihydrouridine synthase-like (DUS)          |
| M5005_Spy0147                                                       | <i>leuS</i>  | <b>1.7</b> | Leucyl tRNA synthetase                                    |
| M5005_Spy0232                                                       | <i>fus</i>   | <b>1.6</b> | Elongation factor G                                       |
| M5005_Spy0345                                                       | <i>metS</i>  | <b>1.5</b> | Methionyl tRNA synthetase                                 |
| M5005_Spy0427                                                       | <i>thrS</i>  | <b>1.7</b> | Threonyl tRNA synthetase                                  |
| M5005_Spy0588                                                       | <i>pheT</i>  | <b>1.6</b> | Phenylalanyl tRNA synthetase                              |
| M5005_Spy1132                                                       | <i>alaS</i>  | <b>1.5</b> | Alanyl tRNA synthetase                                    |
| M5005_Spy1140                                                       | <i>queA</i>  | <b>1.7</b> | Queuosine (Q) biosynthesis protein                        |
| M5005_Spy1330                                                       |              | <b>1.6</b> | Putative RNA binding, ribosomal protein                   |
| M5005_Spy1384                                                       | <i>glyS</i>  | <b>1.6</b> | Glycyl-tRNA synthetase beta subunit                       |
| M5005_Spy1385                                                       | <i>glyQ</i>  | <b>1.6</b> | Glycyl-tRNA synthetase, alpha subunit                     |
| M5005_Spy1483                                                       | <i>serS</i>  | <b>2.9</b> | Seryl tRNA synthetase                                     |

|                  |               |             |                                                                   |
|------------------|---------------|-------------|-------------------------------------------------------------------|
| M5005_Spy1655    | <i>cysS</i>   | <b>2.1</b>  | Cysteinyl-tRNA synthetase                                         |
| M5005_Spy1660    | <i>pnpA</i>   | <b>2.0</b>  | Polynucleotide phosphorylase (PNPase)                             |
| M5005_Spy1685    | <i>dtd</i>    | <b>1.7</b>  | D-Tyrosyl-tRNA <sup>tyr</sup> deacylase                           |
| M5005_Spy1808    | <i>argS</i>   | <b>1.7</b>  | Arginyl tRNA synthetase                                           |
| <b>Transport</b> |               |             |                                                                   |
| M5005_Spy0064    | <i>secY</i>   | <b>2.0</b>  | Preprotein translocase subunit SecY                               |
| M5005_Spy0078    | <i>adcC</i>   | <b>1.6</b>  | ABC transporter                                                   |
| M5005_Spy0079    | <i>adcB</i>   | <b>1.6</b>  | ABC transporter                                                   |
| M5005_Spy0103    |               | <b>1.8</b>  | Deoxynucleoside kinase                                            |
| M5005_Spy0196    |               | <b>1.9</b>  | ABC transporter subunit                                           |
| M5005_Spy0197    |               | <b>1.9</b>  | ABC transporter ATPase subunit                                    |
| M5005_Spy0235    |               | <b>1.7</b>  | ABC transporter subunit                                           |
| M5005_Spy0236    |               | <b>1.7</b>  | ABC transporter permease subunit                                  |
| M5005_Spy0249    | <i>oppA</i>   | <b>1.6</b>  | ABC transporter subunit                                           |
| M5005_Spy0275    |               | <b>1.8</b>  | Serine/threonine/sodium symporter                                 |
| M5005_Spy0370    | <i>mtsC</i>   | <b>1.5</b>  | ABC transporter subunit                                           |
| M5005_Spy0606    | <i>rgpD</i>   | <b>1.6</b>  | ABC transporter subunit                                           |
| M5005_Spy0706    |               | <b>4.7</b>  | ABC transporter substrate-binding protein                         |
| M5005_Spy0707    |               | <b>4.6</b>  | ABC transporter permease subunit                                  |
| M5005_Spy0743    |               | <b>2.7</b>  | ABC transporter substrate binding protein                         |
| M5005_Spy0745    |               | <b>2.5</b>  | ABC transporter permease subunit                                  |
| M5005_Spy0746    |               | <b>3.4</b>  | ABC transporter ATPase subunit                                    |
| M5005_Spy0965    |               | <b>2.6</b>  | Predicted permease                                                |
| M5005_Spy1372    | <i>proB</i>   | <b>2.4</b>  | ABC transporter permease subunit                                  |
| M5005_Spy1373    |               | <b>2.1</b>  | ABC transporter subunit                                           |
| M5005_Spy1480    | <i>manM</i>   | <b>1.7</b>  | PTS system mannose-specific transporter subunit IIC               |
| M5005_Spy1481    | <i>manN</i>   | <b>1.7</b>  | PTS system mannose-specific transporter subunit IID               |
| M5005_Spy1707    | <i>dppD</i>   | <b>1.7</b>  | ABC transporter ATP-binding subunit                               |
| M5005_Spy1708    | <i>dppE</i>   | <b>1.9</b>  | ABC transporter ATP-binding subunit                               |
| <b>Virulence</b> |               |             |                                                                   |
| M5005_Spy0385    |               | <b>2.5</b>  | Acute rheumatic fever streptococcal myosin cross-reactive protein |
| M5005_Spy0880    | <i>hlyIII</i> | <b>12.5</b> | Putative hemolysin III-related/erythrocyte lysis                  |
| M5005_Spy1333    | <i>yvqE</i>   | <b>1.6</b>  | Histidine kinase                                                  |
| M5005_Spy1599    | <i>pgk</i>    | <b>1.6</b>  | 3-phosphoglycerate kinase                                         |
| M5005_Spy1720    | <i>mga</i>    | <b>1.5</b>  | Transcriptional regulator                                         |

#### D. Down-regulated genes during stationary phase

| Locus tag                                       | Gene          | Fold change | Function                                                                        |
|-------------------------------------------------|---------------|-------------|---------------------------------------------------------------------------------|
| <b>Amino acid metabolism and transport</b>      |               |             |                                                                                 |
| M5005_Spy0157                                   | <i>opuAA</i>  | -2.5        | ABC transporter glycine betaine/L-proline ATP binding subunit                   |
| M5005_Spy0158                                   | <i>opuABC</i> | -1.7        | ABC transporter glycine betaine/L-proline transmembrane subunit                 |
| M5005_Spy0549                                   |               | -2.2        | Putative chorismate mutase                                                      |
| M5005_Spy1697                                   | <i>papB</i>   | -1.6        | Aminodeoxychorismate synthase, component I                                      |
| M5005_Spy1698                                   | <i>trpG</i>   | -2.2        | Anthranilate/para-aminobenzoate synthases component II                          |
| <b>Cell wall, membrane, envelope biogenesis</b> |               |             |                                                                                 |
| M5005_Spy0017                                   | <i>sibA</i>   | -1.8        | Protein with a CHAP domain. Putative amidase                                    |
| M5005_Spy0212                                   | <i>nanE</i>   | -3.0        | N-acetylmannosamine-6-phosphate epimerase (Sialic acid degradation)             |
| M5005_Spy0217                                   | <i>nanH</i>   | -2.3        | Dihydrodipicolinate synthase/N-acetylneuraminate lyase                          |
| <b>DNA processing and metabolism</b>            |               |             |                                                                                 |
| M5005_Spy0159                                   | <i>polA</i>   | -1.6        | DNA polymerase I                                                                |
| M5005_Spy0791                                   | <i>uvrC</i>   | -1.9        | Nuclease subunit of the ABC excinuclease; subunit C                             |
| M5005_Spy1117                                   | <i>deaD2</i>  | -1.7        | DEAD-box helicase                                                               |
| M5005_Spy1351                                   |               | -2.1        | Nucleic acid methyltransferase                                                  |
| M5005_Spy1699                                   |               | -2.0        | Recombination factor; similar to protein RarA                                   |
| M5005_Spy1701                                   | <i>flaR</i>   | -1.9        | DNA topology modulation protein FlaR-related                                    |
| M5005_Spy1796                                   |               | -1.6        | Putative endonuclease involved in recombination                                 |
| M5005_Spy0700                                   | <i>cpsX</i>   | -1.5        | CRISPR-associated protein Csm6                                                  |
| <b>Energy production and conversion</b>         |               |             |                                                                                 |
| M5005_Spy0319                                   | <i>ppaC</i>   | -1.6        | Putative manganese-dependent inorganic pyrophosphatase                          |
| <b>Function unknown</b>                         |               |             |                                                                                 |
| M5005_Spy0028                                   |               | -4.8        | Surface antigen, containing a CHAP domain, and proline-recognition domain (PRD) |
| M5005_Spy0176                                   |               | -2.3        | Zinc finger domain containing protein                                           |
| M5005_Spy0260                                   |               | -1.6        | Haloacid dehalogenase (HAD) superfamily of hydrolase proteins                   |
| M5005_Spy0296                                   |               | -1.7        | Acyl phosphatase                                                                |
| M5005_Spy0548                                   | <i>flaV</i>   | -1.8        | Flavodoxin                                                                      |
| M5005_Spy0552                                   |               | -1.5        | Haloacid dehalogenase-like hydrolase                                            |
| M5005_Spy0615                                   | <i>ebsA</i>   | -1.6        | Pore forming protein ebsA                                                       |
| M5005_Spy0616                                   |               | -1.7        | Ferredoxin                                                                      |
| M5005_Spy0632                                   | <i>capA</i>   | -1.7        | Membrane-associated metallophosphatase (MPP) superfamily                        |
| M5005_Spy0834                                   |               | -1.9        | Zn-dependent dehydrogenase                                                      |
| M5005_Spy0835                                   |               | -2.4        | Acid phosphatase/Haloacid dehalogenase (HAD) hydrolase                          |
| M5005_Spy0916                                   | <i>ylxM</i>   | -1.6        | Putative DNA-binding protein                                                    |
| M5005_Spy0944                                   |               | -1.5        | Putative S-adenosylmethionine-dependent methyltransferase                       |
| M5005_Spy1387                                   |               | -1.8        | Predicted oxidoreductase                                                        |
| M5005_Spy1393                                   |               | -2.2        | Haloacid dehalogenase-like hydrolase                                            |
| M5005_Spy1476                                   |               | -2.2        | Putative ATPase or kinase                                                       |
| M5005_Spy1503                                   |               | -1.5        | Broad specificity phosphatase                                                   |

|                                               |             |             |                                                                                 |
|-----------------------------------------------|-------------|-------------|---------------------------------------------------------------------------------|
| M5005_Spy1691                                 |             | <b>-2.3</b> | endonuclease/exonuclease/phosphatase family protein                             |
| M5005_Spy1716                                 |             | <b>-1.9</b> | Transposase domain protein                                                      |
| M5005_Spy1864                                 |             | <b>-2.7</b> | S-adenosyl-L-methionine (AdoMet)-dependent SPOUT methyltransferase              |
| <b>Hypothetical proteins</b>                  |             |             |                                                                                 |
| M5005_Spy0115                                 |             | <b>-2.7</b> | Hypothetical protein                                                            |
| M5005_Spy0177                                 |             | <b>-2.0</b> | Conserved hypothetical protein                                                  |
| M5005_Spy0216                                 |             | <b>-2.3</b> | Hypothetical membrane protein                                                   |
| M5005_Spy0329                                 |             | <b>-1.7</b> | Hypothetical protein                                                            |
| M5005_Spy0676                                 |             | <b>-1.7</b> | Hypothetical protein                                                            |
| M5005_Spy0721                                 |             | <b>-1.9</b> | Hypothetical protein                                                            |
| M5005_Spy0878                                 |             | <b>-1.9</b> | Hypothetical protein                                                            |
| M5005_Spy0901                                 |             | <b>-2.3</b> | Hypothetical protein                                                            |
| M5005_Spy0904                                 |             | <b>-2.3</b> | Hypothetical membrane protein                                                   |
| M5005_Spy0994                                 |             | <b>-1.6</b> | Conserved hypothetical protein                                                  |
| M5005_Spy1080                                 |             | <b>-2.6</b> | Hypothetical protein                                                            |
| M5005_Spy1093                                 |             | <b>-3.8</b> | Hypothetical protein                                                            |
| M5005_Spy1192                                 |             | <b>-3.5</b> | Hypothetical protein                                                            |
| M5005_Spy1258                                 |             | <b>-1.7</b> | Conserved hypothetical protein                                                  |
| M5005_Spy1350                                 |             | <b>-1.5</b> | Hypothetical membrane protein                                                   |
| M5005_Spy1394                                 |             | <b>-2.6</b> | Putative membrane protein                                                       |
| M5005_Spy1411                                 |             | <b>-1.7</b> | Hypothetical protein                                                            |
| M5005_Spy1413                                 |             | <b>-2.3</b> | Hypothetical protein                                                            |
| M5005_Spy1541                                 |             | <b>-2.6</b> | Hypothetical protein                                                            |
| M5005_Spy1567                                 |             | <b>-1.6</b> | Hypothetical membrane protein                                                   |
| M5005_Spy1624                                 |             | <b>-1.9</b> | Hypothetical protein                                                            |
| M5005_Spy1667                                 |             | <b>-2.8</b> | Hypothetical protein                                                            |
| M5005_Spy1696                                 |             | <b>-1.8</b> | Hypothetical protein                                                            |
| M5005_Spy1714                                 |             | <b>-1.6</b> | Hypothetical cell surface protein                                               |
| M5005_Spy1729                                 |             | <b>-1.8</b> | Hypothetical protein                                                            |
| M5005_Spy1755                                 |             | <b>-1.8</b> | Hypothetical protein                                                            |
| M5005_Spy1759                                 |             | <b>-2.1</b> | Hypothetical protein; member of the Nudix hydrolase family                      |
| M5005_Spy1797                                 |             | <b>-1.7</b> | Hypothetical protein                                                            |
| M5005_Spy1859                                 |             | <b>-2.2</b> | Hypothetical protein                                                            |
| M5005_Spy1860                                 |             | <b>-2.8</b> | Hypothetical membrane protein                                                   |
| M5005_Spy1862                                 |             | <b>-2.1</b> | Putative membrane protein                                                       |
| <b>Inorganic ion transport and metabolism</b> |             |             |                                                                                 |
| M5005_Spy0116                                 | <i>atoE</i> | <b>-2.3</b> | Anion permease                                                                  |
| M5005_Spy0550                                 |             | <b>-1.8</b> | Voltage-gated chloride channel                                                  |
| M5005_Spy0598                                 | <i>mscL</i> | <b>-2.9</b> | Large-conductance mechanosensitive channel                                      |
| M5005_Spy0985                                 | <i>phnA</i> | <b>-2.2</b> | Uncharacterized Zn-ribbon-containing protein involved in phosphonate metabolism |
| M5005_Spy1161                                 | <i>focA</i> | <b>-1.7</b> | Putative formate transporter                                                    |
| M5005_Spy1167                                 |             | <b>-1.7</b> | Putative cation transport ATPase                                                |

| <b>Metabolism - Carbon</b>                  |                  |             |                                                                                     |
|---------------------------------------------|------------------|-------------|-------------------------------------------------------------------------------------|
| M5005_Spy0151                               | <i>ulaD</i>      | <b>-2.6</b> | 3-keto-L-gulonate-6-phosphate decarboxylase (L-ascorbate utilization)               |
| M5005_Spy0152                               | <i>ulaE</i>      | <b>-3.9</b> | putative L-xylulose 5-phosphate 3-epimerase (L-ascorbate utilization)               |
| M5005_Spy0153                               | <i>araD/ulaF</i> | <b>-4.0</b> | L-ribulose-5-phosphate epimerase (L-ascorbate utilization)                          |
| M5005_Spy0156                               |                  | <b>-1.9</b> | L-ascorbate-6-phosphate lactonase                                                   |
| M5005_Spy0218                               |                  | <b>-2.5</b> | Putative sugar kinase                                                               |
| M5005_Spy0534                               |                  | <b>-1.7</b> | Putative acetoin reductase                                                          |
| M5005_Spy0695                               | <i>rpiA</i>      | <b>-1.7</b> | Ribose 5-phosphate isomerase type A                                                 |
| M5005_Spy0696                               | <i>deoB</i>      | <b>-1.7</b> | Phosphopentomutase, interconverting ribose-1-p and ribose-5-P                       |
| M5005_Spy0790                               | <i>gabD</i>      | <b>-2.2</b> | Succinate-semialdehyde dehydrogenase                                                |
| M5005_Spy0833                               | <i>maeE</i>      | <b>-9.9</b> | Malic enzyme                                                                        |
| M5005_Spy0902                               |                  | <b>-1.7</b> | Biotin carboxyl carrier protein of oxaloacetate decarboxylase                       |
| M5005_Spy0903                               | <i>oadB</i>      | <b>-2.4</b> | Oxaloacetate decarboxylase beta subunit                                             |
| M5005_Spy0905                               | <i>citD</i>      | <b>-1.9</b> | Citrate lyase subunit gamma                                                         |
| M5005_Spy0906                               | <i>citE</i>      | <b>-1.9</b> | Citrate lyase subunit beta/citryl-CoA lyase subunit                                 |
| M5005_Spy0907                               | <i>citF</i>      | <b>-2.0</b> | Citrate lyase subunit alpha/citrate CoA-transferase                                 |
| M5005_Spy0908                               | <i>citX</i>      | <b>-2.0</b> | Citrate lyase activation subunit                                                    |
| M5005_Spy0986                               | <i>glmS</i>      | <b>-1.6</b> | Glucosamine-fructose-6-phosphate aminotransferase                                   |
| M5005_Spy1062                               | <i>malA</i>      | <b>-2.1</b> | Maltodextrose utilization protein                                                   |
| M5005_Spy1119                               | <i>gapN</i>      | <b>-2.9</b> | Glyceraldehyde-3-P dehydrogenase (non-phosphorylating)                              |
| M5005_Spy1139                               | <i>nagB</i>      | <b>-1.6</b> | Glucosamine-6-phosphate deaminase                                                   |
| M5005_Spy1376                               | <i>tal</i>       | <b>-2.8</b> | Fructose-6-P aldolase/transaldolase                                                 |
| M5005_Spy1380                               | <i>glpO</i>      | <b>-4.6</b> | Glycerol-3-phosphate dehydrogenase                                                  |
| M5005_Spy1381                               | <i>glpK</i>      | <b>-5.5</b> | Glycerol kinase                                                                     |
| M5005_Spy1395                               | <i>lacD.1</i>    | <b>-4.7</b> | Tagatose-6-phosphate aldolase; Lac.1 (cluster I) tagatose pathway                   |
| M5005_Spy1396                               | <i>lacC.1</i>    | <b>-4.7</b> | Tagatose-6-phosphate kinase; Lac.1 (cluster I) tagatose pathway                     |
| M5005_Spy1397                               | <i>lacB.1</i>    | <b>-4.6</b> | Galactose-6-phosphate isomerase subunit LacB.1; Lac.1 (cluster I) tagatose pathway  |
| M5005_Spy1398                               | <i>lacA.1</i>    | <b>-4.5</b> | Galactose-6-phosphate isomerase subunit LacA.1; Lac.1 (cluster I) tagatose pathway  |
| M5005_Spy1543                               | <i>scrB</i>      | <b>-2.4</b> | Glycosyl hydrolase (sucrose utilization)                                            |
| M5005_Spy1632                               | <i>lacG</i>      | <b>-4.3</b> | Phospho-beta-galactosidase                                                          |
| M5005_Spy1635                               | <i>lacD.2</i>    | <b>-3.5</b> | Tagatose-6-phosphate aldolase; Lac.2 (cluster II) tagatose pathway                  |
| M5005_Spy1636                               | <i>lacC.2</i>    | <b>-3.3</b> | Tagatose-6-phosphate kinase; Lac.2 (cluster II) tagatose pathway                    |
| M5005_Spy1637                               | <i>lacB.2</i>    | <b>-3.0</b> | Galactose-6-phosphate isomerase subunit LacB.2; Lac.2 (cluster II) tagatose pathway |
| M5005_Spy1638                               | <i>lacA.2</i>    | <b>-3.2</b> | Galactose-6-phosphate isomerase subunit LacA.2; Lac.2 (cluster II) tagatose pathway |
| M5005_Spy1681                               | <i>dexB</i>      | <b>-1.7</b> | Glucan 1,6-alpha-glucosidase                                                        |
| M5005_Spy1783                               | <i>dexS</i>      | <b>-6.6</b> | Putative alpha amylase/glycosidase                                                  |
| <b>Metabolism - Coenzymes and cofactors</b> |                  |             |                                                                                     |
| M5005_Spy0872                               | <i>nox</i>       | <b>-1.6</b> | NADH oxidase                                                                        |
| <b>Metabolism - Lipids</b>                  |                  |             |                                                                                     |
| M5005_Spy1740                               |                  | <b>-1.7</b> | Phosphatidylglycerophosphatase A, involved in cardiolipin synthesis                 |
| <b>Metabolism - Fermentation pathways</b>   |                  |             |                                                                                     |
| M5005_Spy0039                               | <i>adh2</i>      | <b>-3.5</b> | Acetaldehyde dehydrogenase                                                          |

|                                                                     |              |             |                                                                                           |
|---------------------------------------------------------------------|--------------|-------------|-------------------------------------------------------------------------------------------|
| M5005_Spy0040                                                       | <i>adhA</i>  | <b>-4.9</b> | Alcohol dehydrogenase                                                                     |
| M5005_Spy0094                                                       | <i>ackA</i>  | <b>-1.6</b> | Acetate kinase                                                                            |
| M5005_Spy0318                                                       | <i>pfIC</i>  | <b>-1.9</b> | Pyruvate formate lyase II activating enzyme                                               |
| M5005_Spy0851                                                       | <i>pta</i>   | <b>-1.6</b> | Phosphotransacetylase                                                                     |
| <b>Nucleotide metabolism and transport</b>                          |              |             |                                                                                           |
| M5005_Spy0022                                                       | <i>purC</i>  | <b>-5.5</b> | Phosphoribosylaminoimidazole-succinocarboxamide (SAICAR) synthase                         |
| M5005_Spy0023                                                       | <i>purL</i>  | <b>-2.6</b> | PurL subunit of the formylglycinamide ribonucleotide amidotransferase                     |
| M5005_Spy0024                                                       | <i>purF</i>  | <b>-2.7</b> | Protein with a phosphoribosyl transferase (PRT) domain                                    |
| M5005_Spy0025                                                       | <i>purM</i>  | <b>-2.4</b> | Aminoimidazole Ribonucleotide [AIR] synthetase                                            |
| M5005_Spy0026                                                       | <i>purN</i>  | <b>-2.3</b> | phosphoribosylglycinamide formyltransferase                                               |
| M5005_Spy0027                                                       | <i>purH</i>  | <b>-2.0</b> | Bifunctional phosphoribosylaminoimidazolecarboxamide formyltransferase/IMP cyclohydrolase |
| M5005_Spy0029                                                       | <i>purD</i>  | <b>-2.5</b> | Phosphoribosylglycinamide synthetase involved in de novo purine synthesis                 |
| M5005_Spy0030                                                       | <i>purE</i>  | <b>-2.2</b> | Phosphoribosylcarboxyaminoimidazole (NCAIR) mutase                                        |
| M5005_Spy0031                                                       | <i>purK</i>  | <b>-2.3</b> | Phosphoribosylaminoimidazole carboxylase (NCAIR synthetase)                               |
| M5005_Spy0125                                                       | <i>ntpG</i>  | <b>-2.4</b> | V-type ATP synthase subunit G                                                             |
| M5005_Spy0126                                                       | <i>ntpl</i>  | <b>-2.3</b> | V-type ATP synthase subunit I                                                             |
| M5005_Spy0127                                                       | <i>ntpK</i>  | <b>-2.3</b> | V-type ATP synthase subunit K                                                             |
| M5005_Spy0128                                                       | <i>ntpE</i>  | <b>-2.4</b> | V-type ATP synthase subunit E                                                             |
| M5005_Spy0129                                                       | <i>ntpC</i>  | <b>-2.3</b> | V-type ATP synthase subunit C                                                             |
| M5005_Spy0130                                                       | <i>ntpF</i>  | <b>-2.5</b> | V-type ATP synthase subunit F                                                             |
| M5005_Spy0131                                                       | <i>ntpA</i>  | <b>-2.1</b> | V-type ATP synthase subunit A                                                             |
| M5005_Spy0132                                                       | <i>ntpB</i>  | <b>-2.0</b> | V-type ATP synthase subunit B                                                             |
| M5005_Spy0133                                                       | <i>ntpD</i>  | <b>-2.2</b> | V-type ATP synthase subunit D                                                             |
| M5005_Spy0698                                                       | <i>punA</i>  | <b>-1.7</b> | Purine nucleoside phosphorylase (Pnp)                                                     |
| M5005_Spy0699                                                       | <i>deoD2</i> | <b>-1.6</b> | Purine nucleoside phosphorylase (Pnp)                                                     |
| M5005_Spy0774                                                       |              | <b>-1.6</b> | Nucleoside diphosphate kinase                                                             |
| M5005_Spy0775                                                       |              | <b>-2.0</b> | Nucleoside diphosphate kinase                                                             |
| M5005_Spy1789                                                       | <i>nrdG</i>  | <b>-1.5</b> | Anaerobic ribonucleotide reductase-activating protein                                     |
| <b>Other</b>                                                        |              |             |                                                                                           |
| M5005_Spy1630                                                       | <i>salB</i>  | <b>-3.0</b> | Cyclase involved in the biosynthesis of class II lantibiotics                             |
| M5005_Spy1631                                                       | <i>salA</i>  | <b>-5.1</b> | Type-A lantibiotic                                                                        |
| <b>Phage proteins</b>                                               |              |             |                                                                                           |
| M5005_Spy0913                                                       | <i>xerD</i>  | <b>-1.7</b> | Phage integrase                                                                           |
| M5005_Spy1052                                                       | <i>int.1</i> | <b>-2.2</b> | Phage integrase                                                                           |
| M5005_Spy1467                                                       | <i>int.3</i> | <b>-1.8</b> | Phage integrase                                                                           |
| M5005_Spy1193                                                       |              | <b>-2.9</b> | Phage protein                                                                             |
| M5005_Spy1214                                                       |              | <b>-4.0</b> | Phage protein                                                                             |
| <b>Posttranslational modification, protein turnover, chaperones</b> |              |             |                                                                                           |
| M5005_Spy0341                                                       | <i>prtS</i>  | <b>-1.9</b> | Peptidase                                                                                 |
| M5005_Spy0593                                                       |              | <b>-1.8</b> | Putative zinc metallopeptidase                                                            |
| M5005_Spy0987                                                       | <i>sipC</i>  | <b>-1.9</b> | Signal peptidase I                                                                        |
| M5005_Spy1382                                                       |              | <b>-2.8</b> | Peptidase propeptide                                                                      |



|                                              |               |              |                                                                     |
|----------------------------------------------|---------------|--------------|---------------------------------------------------------------------|
| M5005_Spy1386                                |               | <b>-1.6</b>  | Isoprenylcysteine carboxyl methyltransferase                        |
| M5005_Spy1475                                |               | <b>-1.7</b>  | Acetyltransferase; similar to histone acetyltransferase HPA2        |
| M5005_Spy1700                                |               | <b>-2.2</b>  | Acetyltransferase; related to histone acetyltransferases            |
| M5005_Spy1715                                | <i>scpA</i>   | <b>-1.7</b>  | Peptidase C5                                                        |
| M5005_Spy1758                                |               | <b>-1.6</b>  | Peptidase, C69 family                                               |
| <b>Replication, repair and cell division</b> |               |              |                                                                     |
| M5005_Spy1352                                |               | <b>-2.3</b>  | Cell division protein GpsB                                          |
| <b>General stress</b>                        |               |              |                                                                     |
| M5005_Spy0483                                |               | <b>-1.7</b>  | Putative stress responsive transcriptional regulator                |
| M5005_Spy0697                                | <i>arsC</i>   | <b>-1.7</b>  | Arsenate reductase                                                  |
| M5005_Spy1259                                | <i>dpr</i>    | <b>-3.3</b>  | DNA starvation/stationary phase protection protein                  |
| M5005_Spy1378                                | <i>npx</i>    | <b>-3.0</b>  | NADH peroxidase                                                     |
| M5005_Spy1514                                |               | <b>-1.8</b>  | Universal stress protein                                            |
| M5005_Spy1765                                | <i>csp</i>    | <b>-2.0</b>  | Cold-Shock Protein (CSP)                                            |
| <b>Transcription</b>                         |               |              |                                                                     |
| M5005_Spy0034                                |               | <b>-3.0</b>  | Helix-turn-helix XRE-family like protein                            |
| M5005_Spy0118                                |               | <b>-3.4</b>  | Putative LysR transcriptional regulator                             |
| M5005_Spy0138                                | <i>nusG</i>   | <b>-1.6</b>  | Transcription antitermination protein NusG                          |
| M5005_Spy0186                                |               | <b>-12.4</b> | M trans-acting positive regulator (MGA) PRD domain protein          |
| M5005_Spy0914                                |               | <b>-2.7</b>  | Putative transcriptional regulator                                  |
| M5005_Spy1083                                |               | <b>-2.3</b>  | Transcriptional antiterminator or activator containing a PRD domain |
| M5005_Spy1277                                | <i>ahrC.2</i> | <b>-2.6</b>  | Arginine repressor                                                  |
| M5005_Spy1377                                |               | <b>-2.8</b>  | M regulator protein trans-acting positive regulator (Mga)           |
| M5005_Spy1402                                | <i>lacR.1</i> | <b>-2.4</b>  | Transcriptional regulator of sugar metabolism                       |
| M5005_Spy1412                                | <i>nusA</i>   | <b>-1.7</b>  | Transcription elongation factor                                     |
| M5005_Spy1500                                | <i>hrcA</i>   | <b>-1.9</b>  | Heat-inducible transcription repressor                              |
| M5005_Spy1544                                | <i>scrR</i>   | <b>-1.8</b>  | Putative Transcriptional regulator (sucrose utilization)            |
| M5005_Spy1583                                |               | <b>-1.5</b>  | Putative transcriptional regulator                                  |
| M5005_Spy1625                                | <i>salR</i>   | <b>-1.7</b>  | Signal transduction response regulator                              |
| M5005_Spy1626                                | <i>salk</i>   | <b>-1.7</b>  | Signal transduction histidine kinase                                |
| M5005_Spy1639                                | <i>lacR.2</i> | <b>-2.6</b>  | Transcriptional regulator of sugar metabolism                       |
| M5005_Spy1747                                |               | <b>-1.7</b>  | Transcriptional regulator                                           |
| M5005_Spy1748                                |               | <b>-1.6</b>  | DeoR family transcriptional regulator                               |
| M5005_Spy1760                                |               | <b>-1.9</b>  | Putative transcriptional regulator                                  |
| M5005_Spy1779                                |               | <b>-3.0</b>  | DNA-binding transcriptional activator of the SARP family            |
| M5005_Spy1786                                |               | <b>-3.8</b>  | Putative transcriptional regulator                                  |
| <b>Translation</b>                           |               |              |                                                                     |
| M5005_Spy0207                                | <i>rnpA</i>   | <b>-1.6</b>  | Ribonuclease P protein component                                    |
| M5005_Spy0597                                | <i>rpsU</i>   | <b>-1.7</b>  | 30S ribosomal protein S21                                           |
| M5005_Spy0619                                | <i>infC</i>   | <b>-1.7</b>  | IF-3 translation initiation factor                                  |
| M5005_Spy0620                                | <i>rpl36</i>  | <b>-1.6</b>  | 50S ribosomal protein L35                                           |
| M5005_Spy0621                                | <i>rplT</i>   | <b>-1.6</b>  | 50S ribosomal protein L20                                           |

|                  |                  |              |                                                                                |
|------------------|------------------|--------------|--------------------------------------------------------------------------------|
| M5005_Spy1325    | <i>raiA</i>      | <b>-1.8</b>  | RaiA ("ribosome-associated inhibitor A)                                        |
| M5005_Spy1338    | <i>fmt</i>       | <b>-1.5</b>  | Methionyl-tRNA formyltransferase                                               |
| M5005_Spy1408    | <i>rbfA</i>      | <b>-1.6</b>  | Ribosome-binding factor A                                                      |
| M5005_Spy1410    |                  | <b>-1.7</b>  | Ribosomal protein HS6-type (S12/L30/L7a)                                       |
| M5005_Spy1666    | <i>rpsO</i>      | <b>-2.0</b>  | 30S ribosomal protein S15                                                      |
| M5005_Spy1694    |                  | <b>-1.8</b>  | Putative 16S ribosomal RNA methyltransferase RsmE                              |
| M5005_Spy1695    | <i>prmA</i>      | <b>-1.9</b>  | Putative ribosomal protein L11 methyltransferase                               |
| <b>Transport</b> |                  |              |                                                                                |
| M5005_Spy0117    |                  | <b>-2.7</b>  | Putative transport protein                                                     |
| M5005_Spy0149    |                  | <b>-4.0</b>  | Phosphotransferase system, galactitol-specific IIB component                   |
| M5005_Spy0150    |                  | <b>-3.9</b>  | Phosphotransferase system, IIA component                                       |
| M5005_Spy0213    |                  | <b>-2.7</b>  | ABC transporter for polysaccharides subunit                                    |
| M5005_Spy0214    |                  | <b>-2.4</b>  | ABC transporter for polysaccharides permease subunit                           |
| M5005_Spy0215    |                  | <b>-2.4</b>  | ABC transporter for polysaccharides transmembrane subunit                      |
| M5005_Spy0220    | <i>tatD</i>      | <b>-1.6</b>  | Sec-independent protein translocase                                            |
| M5005_Spy0428    | <i>drrA</i>      | <b>-1.8</b>  | ABC transporter, ATPase subunit                                                |
| M5005_Spy0430    |                  | <b>-1.8</b>  | ABC transporter, permease subunit                                              |
| M5005_Spy0780    |                  | <b>-2.0</b>  | Phosphotransferase system, mannose/fructose-specific component IIA             |
| M5005_Spy0782    | <i>ptsC</i>      | <b>-1.9</b>  | Phosphotransferase system, mannose/fructose-specific component IIC             |
| M5005_Spy0783    | <i>ptsD</i>      | <b>-1.9</b>  | Phosphotransferase system, mannose/fructose-specific component IID             |
| M5005_Spy0832    | <i>maeP</i>      | <b>-11.3</b> | Putative malate transporter                                                    |
| M5005_Spy1063    | <i>malD</i>      | <b>-2.1</b>  | ABC transporter transmembrane subunit                                          |
| M5005_Spy1064    | <i>malC</i>      | <b>-2.0</b>  | Maltose/maltodextrin transporter membrane protein                              |
| M5005_Spy1067    | <i>malX</i>      | <b>-2.0</b>  | Maltose/maltodextrin transporter subunit                                       |
| M5005_Spy1079    |                  | <b>-2.5</b>  | Phosphotransferase system, component IIC                                       |
| M5005_Spy1081    |                  | <b>-2.5</b>  | Phosphotransferase system, component IIA                                       |
| M5005_Spy1082    |                  | <b>-2.5</b>  | Phosphotransferase system, component IIB                                       |
| M5005_Spy1121    | <i>ptsH</i>      | <b>-1.9</b>  | Phosphotransferase System HPr (HPr)                                            |
| M5005_Spy1379    | <i>glpF</i>      | <b>-4.4</b>  | Major intrinsic protein (MIP) superfamily protein; glycerol uptake facilitator |
| M5005_Spy1399    | <i>ptsIIc</i>    | <b>-5.9</b>  | PTS galactose-specific EIIc component; Lac.1 (cluster I) tagatose pathway      |
| M5005_Spy1400    | <i>ptsIIb</i>    | <b>-6.0</b>  | PTS galactose-specific EIIb component; Lac.1 (cluster I) tagatose pathway      |
| M5005_Spy1401    | <i>ptsIIa</i>    | <b>-5.2</b>  | PTS galactose-specific EIIa component; Lac.1 (cluster I) tagatose pathway      |
| M5005_Spy1477    |                  | <b>-3.7</b>  | Permease                                                                       |
| M5005_Spy1542    | <i>scrA</i>      | <b>-2.4</b>  | PTS system sucrose-specific transporter subunit II (sucrose utilization)       |
| M5005_Spy1627    | <i>salY</i>      | <b>-2.5</b>  | ABC transporter; permease component                                            |
| M5005_Spy1628    | <i>salX</i>      | <b>-3.2</b>  | ABC transporter; ATPase component                                              |
| M5005_Spy1629    | <i>salX/salT</i> | <b>-3.5</b>  | ABC-type bacteriocin/lantibiotic exporter                                      |
| M5005_Spy1633    | <i>lacE</i>      | <b>-4.6</b>  | PTS lactose-specific EIIb component; Lac.2 (cluster II) tagatose pathway       |
| M5005_Spy1634    | <i>lacF</i>      | <b>-3.4</b>  | PTS lactose-specific EIIa component; Lac.2 (cluster II) tagatose pathway       |
| M5005_Spy1692    |                  | <b>-2.0</b>  | PTS system glucose/maltose-specific transporter subunit IIC                    |
| M5005_Spy1784    |                  | <b>-7.6</b>  | Phosphotransferase system IIABC component                                      |
| <b>Virulence</b> |                  |              |                                                                                |
| M5005_Spy0282    | <i>covR</i>      | <b>-1.8</b>  | Response regulator of virulence gene expression                                |

---

|               |              |             |                                               |
|---------------|--------------|-------------|-----------------------------------------------|
| M5005_Spy0283 | <i>covS</i>  | <b>-1.9</b> | Histidine kinase of virulence gene expression |
| M5005_Spy1065 | <i>amyA</i>  | <b>-2.0</b> | Maltose/Maltodextrin glucosidase              |
| M5005_Spy1540 | <i>endoS</i> | <b>-2.2</b> | Endo-beta-N-acetylglucosaminidase             |

---

**TABLE S3 Differentially-expressed genes comparing the isogenic *fabT* deletion mutant to the wild-type MGAS2221 grown at 40 °C**

**A. Up-regulated genes during mid-exponential phase**

| Locus tag                                                           | Gene        | Fold change | Function                                                       |
|---------------------------------------------------------------------|-------------|-------------|----------------------------------------------------------------|
| <b>Cell wall, membrane, envelope biogenesis</b>                     |             |             |                                                                |
| M5005_Spy0425                                                       |             | <b>1.9</b>  | Glycosyltransferase involved in cell envelope biogenesis       |
| M5005_Spy0426                                                       |             | <b>1.9</b>  | Glycosyltransferase involved in cell envelope biogenesis       |
| <b>DNA processing and metabolism</b>                                |             |             |                                                                |
| M5005_Spy0964                                                       |             | <b>1.6</b>  | Type I restriction endonuclease subunit                        |
| M5005_Spy1075                                                       | <i>uvrB</i> | <b>1.6</b>  | Excinuclease ABC, B subunit                                    |
| M5005_Spy1228                                                       | <i>recN</i> | <b>1.5</b>  | ATPase involved in DNA repair                                  |
| <b>Function unknown</b>                                             |             |             |                                                                |
| M5005_Spy1650                                                       | <i>degV</i> | <b>1.9</b>  | Uncharacterized protein containing a bound fatty acid molecule |
| M5005_Spy1828                                                       |             | <b>30.3</b> | Membrane protein/Phage receptor in <i>L. lactis</i>            |
| <b>Hypothetical</b>                                                 |             |             |                                                                |
| M5005_Spy1143                                                       |             | <b>3.2</b>  | Hypothetical protein                                           |
| M5005_Spy1144                                                       |             | <b>2.8</b>  | Hypothetical protein                                           |
| <b>Inorganic ion transport</b>                                      |             |             |                                                                |
| M5005_Spy1152                                                       | <i>kup</i>  | <b>1.6</b>  | Potassium transporter                                          |
| <b>Metabolism - Carbon</b>                                          |             |             |                                                                |
| M5005_Spy0751                                                       | <i>acoA</i> | <b>1.7</b>  | Pyruvate dehydrogenase E1 component, alpha subunit             |
| M5005_Spy0752                                                       | <i>acoB</i> | <b>1.7</b>  | Pyruvate dehydrogenase E1 component, beta subunit              |
| <b>Metabolism - Lipids</b>                                          |             |             |                                                                |
| M5005_Spy0879                                                       | <i>dgk</i>  | <b>3.2</b>  | Diacylglycerol kinase (DAG)                                    |
| M5005_Spy1484                                                       | <i>accD</i> | <b>7.1</b>  | Acetyl-CoA carboxylase subunit                                 |
| M5005_Spy1485                                                       | <i>accA</i> | <b>7.2</b>  | Acetyl-CoA carboxylase subunit                                 |
| M5005_Spy1486                                                       | <i>accC</i> | <b>7.1</b>  | Acetyl-CoA carboxylase subunit                                 |
| M5005_Spy1487                                                       | <i>fabZ</i> | <b>6.7</b>  | Beta-hydroxyacyl-ACP dehydrase                                 |
| M5005_Spy1488                                                       | <i>accB</i> | <b>6.7</b>  | Acetyl-CoA carboxylase subunit                                 |
| M5005_Spy1489                                                       | <i>fabF</i> | <b>6.8</b>  | Beta-ketoacyl-ACP synthase II (KAS II)                         |
| M5005_Spy1490                                                       | <i>fabG</i> | <b>6.3</b>  | Beta-ketoacyl-ACP reductase                                    |
| M5005_Spy1491                                                       | <i>fabD</i> | <b>6.0</b>  | Malonyl-CoA:ACP-transacylase                                   |
| M5005_Spy1492                                                       | <i>fabK</i> | <b>5.7</b>  | Enoyl-ACP reductase II                                         |
| <b>Metabolism - Fermentation pathways</b>                           |             |             |                                                                |
| M5005_Spy0318                                                       | <i>pflC</i> | <b>1.6</b>  | Pyruvate formate lyase activating enzyme                       |
| M5005_Spy1569                                                       | <i>pfl</i>  | <b>2.3</b>  | Pyruvate formate lyase                                         |
| <b>Nucleotide metabolism and transport</b>                          |             |             |                                                                |
| M5005_Spy0012                                                       | <i>hpt</i>  | <b>1.6</b>  | Hypoxanthine phosphoribosyl transferase                        |
| <b>Posttranslational modification, protein turnover, chaperones</b> |             |             |                                                                |

|                                              |               |            |                                                                   |
|----------------------------------------------|---------------|------------|-------------------------------------------------------------------|
| M5005_Spy1142                                |               | <b>2.7</b> | Hypothetical protein/peptidase S11                                |
| <b>Replication, repair and cell division</b> |               |            |                                                                   |
| M5005_Spy0013                                | <i>ftsH</i>   | <b>1.6</b> | ATP-dependent zinc metalloprotease                                |
| <b>Transcription</b>                         |               |            |                                                                   |
| M5005_Spy0483                                |               | <b>1.7</b> | Putative stress-responsive transcriptional regulator              |
| M5005_Spy0881                                |               | <b>5.2</b> | Transcription regulator; MerR family                              |
| M5005_Spy0991                                |               | <b>1.7</b> | Transcriptional regulator, GntR family                            |
| M5005_Spy1798                                | <i>spxA</i>   | <b>2.3</b> | Transcriptional regulator                                         |
| M5005_Spy1830                                |               | <b>2.1</b> | Transcriptional regulator                                         |
| <b>Transport</b>                             |               |            |                                                                   |
| M5005_Spy0270                                | <i>atmA</i>   | <b>1.6</b> | ABC transporter substrate binding domain                          |
| M5005_Spy0965                                |               | <b>1.8</b> | ABC-type transport system predicted permease                      |
| M5005_Spy0967                                |               | <b>1.8</b> | ABC transporter, ATP-binding domain                               |
| M5005_Spy0992                                |               | <b>1.7</b> | ABC transporter, ATPase component                                 |
| M5005_Spy0993                                |               | <b>1.6</b> | ABC transporter, permease component                               |
| M5005_Spy1784                                |               | <b>1.7</b> | PTS system IIA component                                          |
| <b>Virulence</b>                             |               |            |                                                                   |
| M5005_Spy0385                                |               | <b>5.0</b> | Acute rheumatic fever streptococcal myosin cross-reactive protein |
| M5005_Spy0880                                | <i>hlyIII</i> | <b>4.4</b> | Hemolysin III-related/erythrocyte lysis                           |
| M5005_Spy1106                                | <i>grab</i>   | <b>2.9</b> | Protein G-related alpha 2 macroglobulin-binding protein (GRAB)    |
| M5005_Spy1720                                | <i>mga</i>    | <b>1.5</b> | Transcriptional regulator of virulence genes                      |

## B. Down-regulated genes during mid-exponential phase

| Locus tag                                     | Gene        | Fold change | Function                                       |
|-----------------------------------------------|-------------|-------------|------------------------------------------------|
| <b>DNA processing and metabolism</b>          |             |             |                                                |
| M5005_Spy1169                                 | <i>spd3</i> | <b>-3.7</b> | DNA/RNA non-specific endonuclease              |
| <b>Function unknown</b>                       |             |             |                                                |
| M5005_Spy1407                                 |             | <b>-2.1</b> | Putative esterase/lipase                       |
| <b>Hypothetical proteins</b>                  |             |             |                                                |
| M5005_Spy0115                                 |             | <b>-2.2</b> | Hypothetical protein                           |
| M5005_Spy0717                                 |             | <b>-1.5</b> | Hypothetical protein                           |
| M5005_Spy0718                                 |             | <b>-2.1</b> | Hypothetical protein                           |
| M5005_Spy1170                                 |             | <b>-3.5</b> | Hypothetical membrane protein                  |
| M5005_Spy1205                                 |             | <b>-2.9</b> | Hypothetical protein                           |
| M5005_Spy1216                                 |             | <b>-1.8</b> | Hypothetical protein                           |
| M5005_Spy1382                                 |             | <b>-2.4</b> | Hypothetical protein                           |
| M5005_Spy1530                                 |             | <b>-1.9</b> | Cell surface protein with leucine-rich repeats |
| M5005_Spy1714                                 |             | <b>-2.5</b> | Hypothetical cell surface protein              |
| <b>Inorganic ion transport and metabolism</b> |             |             |                                                |

|                                                                     |                |             |                                                                                     |
|---------------------------------------------------------------------|----------------|-------------|-------------------------------------------------------------------------------------|
| M5005_Spy0653                                                       | <i>czcD</i>    | <b>-2.2</b> | Co/Zn/Cd efflux system component                                                    |
| M5005_Spy1575                                                       | <i>norA</i>    | <b>-2.0</b> | Uncharacterized MFS-type transporter                                                |
| <b>Metabolism - Carbon</b>                                          |                |             |                                                                                     |
| M5005_Spy1119                                                       | <i>gapN</i>    | <b>-2.7</b> | NADP-dependent glyceraldehyde-3-phosphate dehydrogenase                             |
| M5005_Spy1637                                                       | <i>lacB.2</i>  | <b>-2.7</b> | Galactose-6-phosphate isomerase subunit LacB.2; Lac.2 (cluster II) tagatose pathway |
| M5005_Spy1638                                                       | <i>lacA.2</i>  | <b>-2.6</b> | Galactose-6-phosphate isomerase subunit LacA.2; Lac.2 (cluster II) tagatose pathway |
| <b>Metabolism - Coenzymes and cofactors</b>                         |                |             |                                                                                     |
| M5005_Spy0652                                                       |                | <b>-1.7</b> | Putative pyridoxamine 5'-phosphate oxidase                                          |
| <b>Posttranslational modification, protein turnover, chaperones</b> |                |             |                                                                                     |
| M5005_Spy0114                                                       |                | <b>-2.3</b> | Sortase (surface protein trans-peptidase)                                           |
| M5005_Spy1715                                                       | <i>scpA</i>    | <b>-2.6</b> | Peptidase C5                                                                        |
| <b>General stress</b>                                               |                |             |                                                                                     |
| M5005_Spy1574                                                       |                | <b>-2.4</b> | Putative universal stress protein UspA                                              |
| <b>Transport</b>                                                    |                |             |                                                                                     |
| M5005_Spy1704                                                       | <i>dppA</i>    | <b>-1.6</b> | ABC transporter, substrate-binding component                                        |
| <b>Virulence</b>                                                    |                |             |                                                                                     |
| M5005_Spy0139                                                       | <i>nga</i>     | <b>-3.2</b> | Nicotine adenine dinucleotide glycohydrolase (NADase)                               |
| M5005_Spy0140                                                       | <i>ifs</i>     | <b>-3.2</b> | Protein immunity factor for Nga                                                     |
| M5005_Spy0141                                                       | <i>slo</i>     | <b>-3.0</b> | Streptolysin O (SLO), a cytolytic exotoxin                                          |
| M5005_Spy1415                                                       | <i>sdaD2</i>   | <b>-3.3</b> | Streptodornase                                                                      |
| M5005_Spy1684                                                       | <i>ska</i>     | <b>-2.4</b> | Staphylokinase                                                                      |
| M5005_Spy1718                                                       | <i>sic1.01</i> | <b>-2.4</b> | Streptococcal inhibitor of complement                                               |

### C. Up-regulated genes during stationary phase

| Locus tag                                       | Gene         | Fold change | Function                                                          |
|-------------------------------------------------|--------------|-------------|-------------------------------------------------------------------|
| <b>Cell wall, membrane, envelope biogenesis</b> |              |             |                                                                   |
| M5005_Spy0384                                   |              | <b>2.0</b>  | Putative peptidoglycan-binding protein                            |
| M5005_Spy0684                                   | <i>mvaK2</i> | <b>1.7</b>  | Mevalonate kinase; mevalonate pathway                             |
| M5005_Spy0685                                   |              | <b>1.6</b>  | IPP isomerase; mevalonate pathway                                 |
| M5005_Spy1070                                   | <i>dltD</i>  | <b>1.5</b>  | Protein involved in D-alanine esterification of lipoteichoic acid |
| M5005_Spy1071                                   | <i>dltC</i>  | <b>1.8</b>  | D-alanyl carrier protein                                          |
| M5005_Spy1072                                   | <i>dltB</i>  | <b>1.6</b>  | Putative membrane protein involved in D-alanine export            |
| M5005_Spy1252                                   | <i>murG</i>  | <b>1.5</b>  | Peptidoglycan synthesis protein                                   |
| <b>DNA processing and metabolism</b>            |              |             |                                                                   |
| M5005_Spy0397                                   |              | <b>1.8</b>  | Transposase                                                       |
| M5005_Spy0557                                   |              | <b>3.3</b>  | Transposase IS116/IS110/IS902 family                              |
| M5005_Spy0558                                   |              | <b>2.7</b>  | Transposase                                                       |
| M5005_Spy0913                                   | <i>xerD</i>  | <b>1.7</b>  | Site-specific DNA recombinase                                     |
| <b>Energy production and conversion</b>         |              |             |                                                                   |

|                                               |              |             |                                                                      |
|-----------------------------------------------|--------------|-------------|----------------------------------------------------------------------|
| M5005_Spy0579                                 | <i>atpA</i>  | <b>1.8</b>  | FOF1 ATP synthase alpha subunit                                      |
| M5005_Spy0580                                 | <i>atpG</i>  | <b>1.8</b>  | FOF1 ATP synthase gamma subunit                                      |
| M5005_Spy0581                                 | <i>atpD</i>  | <b>2.0</b>  | FOF1 ATP synthase beta subunit                                       |
| M5005_Spy0582                                 | <i>atpC</i>  | <b>2.0</b>  | FOF1 ATP synthase delta subunit                                      |
| <b>Function unknown</b>                       |              |             |                                                                      |
| M5005_Spy0610                                 |              | <b>1.6</b>  | Putative glycosyl transferase                                        |
| M5005_Spy0931                                 |              | <b>1.9</b>  | Glycine cleavage H-protein                                           |
| M5005_Spy0932                                 |              | <b>1.9</b>  | Flavin-dependent oxidoreductase                                      |
| M5005_Spy0933                                 |              | <b>1.5</b>  | NADH/Flavin oxidoreductase                                           |
| M5005_Spy1248                                 |              | <b>1.7</b>  | Putative pyridoxal phosphate enzyme                                  |
| M5005_Spy1311                                 |              | <b>2.0</b>  | Putative transcriptional regulator/sugar kinase                      |
| M5005_Spy1407                                 |              | <b>2.6</b>  | Esterase/lipase                                                      |
| M5005_Spy1523                                 |              | <b>1.6</b>  | Putative membrane protein                                            |
| M5005_Spy1601                                 |              | <b>1.5</b>  | Band 7-domain protein. It may cluster to form membrane micro-domains |
| M5005_Spy1650                                 | <i>degV</i>  | <b>1.7</b>  | Uncharacterized protein containing a bound fatty-acid molecule       |
| M5005_Spy1654                                 |              | <b>2.0</b>  | Putative ribonuclease                                                |
| M5005_Spy1828                                 |              | <b>25.5</b> | Membrane protein/Phage receptor in <i>L. lactis</i>                  |
| <b>Hypothetical proteins</b>                  |              |             |                                                                      |
| M5005_Spy0198                                 |              | <b>1.6</b>  | Hypothetical conserved protein                                       |
| M5005_Spy0383                                 |              | <b>2.1</b>  | Hypothetical protein                                                 |
| M5005_Spy0399                                 |              | <b>2.1</b>  | Hypothetical protein                                                 |
| M5005_Spy0402                                 |              | <b>2.1</b>  | Hypothetical protein                                                 |
| M5005_Spy0716                                 |              | <b>1.6</b>  | Hypothetical protein                                                 |
| M5005_Spy0930                                 |              | <b>2.0</b>  | Hypothetical protein; putative ADP-ribose binding domain             |
| M5005_Spy1247                                 |              | <b>1.9</b>  | Hypothetical protein                                                 |
| M5005_Spy1312                                 |              | <b>2.4</b>  | Hypothetical protein                                                 |
| M5005_Spy1316                                 |              | <b>2.6</b>  | Hypothetical protein                                                 |
| M5005_Spy1552                                 |              | <b>1.6</b>  | Hypothetical membrane protein                                        |
| M5005_Spy1656                                 |              | <b>1.7</b>  | Hypothetical protein                                                 |
| M5005_Spy1659                                 |              | <b>2.2</b>  | Hypothetical protein                                                 |
| M5005_Spy1731                                 |              | <b>2.1</b>  | Hypothetical protein                                                 |
| M5005_Spy1788                                 | <i>yaaA</i>  | <b>1.5</b>  | Hypothetical protein                                                 |
| <b>Inorganic ion transport and metabolism</b> |              |             |                                                                      |
| M5005_Spy0321                                 | <i>fhuG</i>  | <b>2.6</b>  | Iron transporter                                                     |
| M5005_Spy0322                                 | <i>fhuB</i>  | <b>2.9</b>  | Iron transporter                                                     |
| M5005_Spy0323                                 | <i>fhuD</i>  | <b>2.1</b>  | Iron transporter                                                     |
| M5005_Spy0952                                 | <i>pstB2</i> | <b>2.1</b>  | ATP-binding cassette domain of the phosphate transport system        |
| M5005_Spy0953                                 | <i>pstA</i>  | <b>2.0</b>  | Phosphate transporter ATP-binding protein                            |
| M5005_Spy0954                                 | <i>pstC</i>  | <b>1.9</b>  | Phosphate transporter permease subunit PstC                          |
| M5005_Spy0978                                 |              | <b>2.4</b>  | Na <sup>+</sup> /alanine symporter                                   |
| M5005_Spy1404                                 | <i>copZ</i>  | <b>3.0</b>  | Copper chaperone                                                     |
| <b>Metabolism - Carbon</b>                    |              |             |                                                                      |

|                                                                     |               |             |                                                                                 |
|---------------------------------------------------------------------|---------------|-------------|---------------------------------------------------------------------------------|
| M5005_Spy0522                                                       | <i>ugl</i>    | <b>3.6</b>  | Unsaturated glucuronyl hydrolase                                                |
| M5005_Spy0753                                                       | <i>acoC</i>   | <b>1.7</b>  | Pyruvate dehydrogenase, dihydrolipoamide acyltransferase (E2) component         |
| M5005_Spy0830                                                       | <i>citA</i>   | <b>1.9</b>  | Response regulator of citrate/malate metabolism                                 |
| M5005_Spy0831                                                       | <i>citB</i>   | <b>1.9</b>  | Histidine kinase of citrate/malate metabolism                                   |
| M5005_Spy0898                                                       | <i>citG</i>   | <b>2.3</b>  | ATP:dephospho-CoA triphosphoribosyl transferase; citrate lyase prosthetic group |
| M5005_Spy1139                                                       | <i>nagB</i>   | <b>1.8</b>  | Glucosamine-6-phosphate isomerase/deaminase                                     |
| M5005_Spy1313                                                       |               | <b>1.8</b>  | Beta glucosidase/beta-galactosidase                                             |
| M5005_Spy1314                                                       | <i>hyl</i>    | <b>2.1</b>  | Beta-N-acetylglucosaminidase/hyaluronidase                                      |
| M5005_Spy1317                                                       |               | <b>2.1</b>  | Alpha mannosidase/glycosyl hydrolase                                            |
| M5005_Spy1741                                                       | <i>gldA</i>   | <b>1.8</b>  | Glycerol dehydrogenases; it catalyzes oxidation of glycerol to dihydroxyacetone |
| M5005_Spy1742                                                       | <i>mipB</i>   | <b>1.8</b>  | Transaldolase                                                                   |
| <b>Metabolism - Lipids</b>                                          |               |             |                                                                                 |
| M5005_Spy0879                                                       | <i>dgk</i>    | <b>5.5</b>  | Diacylglycerol (DAG) kinase                                                     |
| M5005_Spy1484                                                       | <i>accD</i>   | <b>19.8</b> | Acetyl-CoA carboxylase subunit                                                  |
| M5005_Spy1485                                                       | <i>accA</i>   | <b>22.0</b> | Acetyl-CoA carboxylase subunit                                                  |
| M5005_Spy1486                                                       | <i>accC</i>   | <b>20.6</b> | Acetyl-CoA carboxylase subunit                                                  |
| M5005_Spy1487                                                       | <i>fabZ</i>   | <b>20.4</b> | Beta-hydroxyacyl-ACP dehydrase                                                  |
| M5005_Spy1488                                                       | <i>accB</i>   | <b>21.2</b> | Acetyl-CoA carboxylase subunit                                                  |
| M5005_Spy1489                                                       | <i>fabF</i>   | <b>19.8</b> | Beta-ketoacyl-ACP synthase II (KAS II)                                          |
| M5005_Spy1490                                                       | <i>fabG</i>   | <b>18.1</b> | Beta-ketoacyl-ACP reductase                                                     |
| M5005_Spy1491                                                       | <i>fabD</i>   | <b>17.5</b> | Malonyl-CoA:ACP-transacylase                                                    |
| M5005_Spy1492                                                       | <i>fabK</i>   | <b>15.8</b> | Enoyl-ACP reductase II                                                          |
| M5005_Spy1493                                                       | <i>acpP</i>   | <b>7.5</b>  | Acyl carrier protein (ACP)                                                      |
| M5005_Spy1494                                                       | <i>fabH</i>   | <b>6.6</b>  | Beta-ketoacyl-ACP synthase III (KAS III)                                        |
| <b>Metabolism - Coenzymes and cofactors</b>                         |               |             |                                                                                 |
| M5005_Spy0244                                                       | <i>nifS3</i>  | <b>1.8</b>  | Bi-functional selenocysteine lyase/cysteine desulfurase                         |
| M5005_Spy0245                                                       | <i>nifU</i>   | <b>1.8</b>  | NifU homolog involved in Fe-S cluster formation                                 |
| M5005_Spy0246                                                       | <i>sufS</i>   | <b>1.7</b>  | FeS assembly protein SufB                                                       |
| <b>Metabolism - Fermentation pathways</b>                           |               |             |                                                                                 |
| M5005_Spy1743                                                       | <i>pflD</i>   | <b>2.0</b>  | Pyruvate formate lyase 2                                                        |
| M5005_Spy1749                                                       | <i>pflA</i>   | <b>3.7</b>  | Pyruvate formate lyase activating enzyme 1                                      |
| <b>Nucleotide transport and metabolism</b>                          |               |             |                                                                                 |
| M5005_Spy1660                                                       | <i>pnpA</i>   | <b>1.7</b>  | Polynucleotide phosphorylase (PNPase)                                           |
| M5005_Spy0348                                                       | <i>nrdI</i>   | <b>2.3</b>  | Ribonucleotide reductase stimulatory protein                                    |
| M5005_Spy0349                                                       | <i>nrdE.1</i> | <b>2.3</b>  | Ribonucleotide diphosphate reductase, alpha subunit                             |
| M5005_Spy0641                                                       | <i>pyrB</i>   | <b>2.9</b>  | Aspartate/ornithine carbamoyl transferase                                       |
| M5005_Spy0642                                                       | <i>carA</i>   | <b>3.0</b>  | Carbamoyl phosphate synthase small subunit                                      |
| M5005_Spy0643                                                       | <i>carB</i>   | <b>3.4</b>  | Carbamoyl phosphate synthase large subunit                                      |
| <b>Other</b>                                                        |               |             |                                                                                 |
| M5005_Spy0393                                                       |               | <b>2.0</b>  | Bacteriocin                                                                     |
| M5005_Spy1137                                                       | <i>coiA</i>   | <b>2.9</b>  | Competence protein CoiA-like family                                             |
| <b>Posttranslational modification, protein turnover, chaperones</b> |               |             |                                                                                 |



|                       |               |            |                                                                     |
|-----------------------|---------------|------------|---------------------------------------------------------------------|
| M5005_Spy0351         | <i>spyA</i>   | <b>2.8</b> | ADP ribosyl transferase                                             |
| M5005_Spy0382         | <i>msrA.2</i> | <b>1.9</b> | Putative methionine sulfoxide reductase                             |
| M5005_Spy0416         |               | <b>2.6</b> | Glutamine cyclotransferase                                          |
| M5005_Spy0928         | <i>lplA</i>   | <b>1.9</b> | Lipoate protein ligase/lipoyl transferase                           |
| M5005_Spy0929         |               | <b>2.0</b> | NAD-dependent protein deacetylase, SIR2 family                      |
| M5005_Spy1136         | <i>pepB</i>   | <b>1.8</b> | Peptidase family M3B Oligopeptidase F                               |
| M5005_Spy1577         | <i>pepXP</i>  | <b>1.8</b> | X-Prolyl dipeptidyl aminopeptidase                                  |
| M5005_Spy1658         | <i>cysE</i>   | <b>1.8</b> | Serine acetyltransferase                                            |
| <b>General stress</b> |               |            |                                                                     |
| M5005_Spy0891         | <i>satD</i>   | <b>2.0</b> | Sat operon component, possibly involved in acid resistance          |
| M5005_Spy0892         | <i>satE</i>   | <b>2.6</b> | Sat operon component, possibly involved in acid resistance          |
| <b>Transcription</b>  |               |            |                                                                     |
| M5005_Spy0155         |               | <b>1.6</b> | Transcriptional antiterminator with PTS regulation domain           |
| M5005_Spy0195         |               | <b>2.9</b> | Putative transcriptional regulator                                  |
| M5005_Spy0559         |               | <b>2.3</b> | M protein trans-acting positive regulator (MGA) PRD domain          |
| M5005_Spy0560         |               | <b>1.9</b> | Transcriptional regulator                                           |
| M5005_Spy0881         |               | <b>3.1</b> | MerR-type transcription regulator                                   |
| M5005_Spy0899         |               | <b>1.6</b> | Putative transcriptional regulator                                  |
| M5005_Spy1306         | <i>trxS</i>   | <b>1.6</b> | Putative signal transduction histidine kinase                       |
| M5005_Spy1315         |               | <b>2.6</b> | Putative transcriptional regulator                                  |
| M5005_Spy1747         |               | <b>2.5</b> | Putative transcriptional regulator of sugar metabolism              |
| M5005_Spy1748         |               | <b>2.4</b> | Putative transcriptional regulator of sugar metabolism              |
| <b>Translation</b>    |               |            |                                                                     |
| M5005_Spy0071         | <i>rplQ</i>   | <b>1.6</b> | 50S ribosomal protein L17                                           |
| M5005_Spy0104         |               | <b>1.5</b> | Putative tRNA dihydrouridine synthase-like (DUS)                    |
| M5005_Spy0414         |               | <b>3.1</b> | Ribonuclease R                                                      |
| M5005_Spy0415         | <i>smpB</i>   | <b>3.2</b> | Small protein B (SmpB), a component of the trans-translation system |
| M5005_Spy1138         |               | <b>2.6</b> | 16S rRNA pseudouridine synthase, <i>Escherichia coli</i> RsuA like  |
| M5005_Spy1655         | <i>cysS</i>   | <b>1.6</b> | CysteinyI-tRNA synthetase                                           |
| <b>Transport</b>      |               |            |                                                                     |
| M5005_Spy0078         | <i>adcC</i>   | <b>1.7</b> | ABC transporter                                                     |
| M5005_Spy0079         | <i>adcB</i>   | <b>1.6</b> | ABC transporter                                                     |
| M5005_Spy0103         |               | <b>1.6</b> | Deoxynucleoside kinase                                              |
| M5005_Spy0158         | <i>opuABC</i> | <b>1.8</b> | ABC transporter transmembrane subunit                               |
| M5005_Spy0169         |               | <b>2.1</b> | Anion permease                                                      |
| M5005_Spy0196         |               | <b>3.5</b> | ABC transporter subunit                                             |
| M5005_Spy0197         |               | <b>3.5</b> | ABC transporter ATPase subunit                                      |
| M5005_Spy0370         | <i>mtsC</i>   | <b>1.8</b> | ABC transporter subunit                                             |
| M5005_Spy0475         |               | <b>1.8</b> | Phosphotransferase system IIA component                             |
| M5005_Spy0519         | <i>agaD</i>   | <b>3.2</b> | PTS system mannose/fructose/sorbose family IID component            |
| M5005_Spy0520         | <i>agaW</i>   | <b>2.8</b> | PTS system mannose/fructose/sorbose family IIC component            |
| M5005_Spy0521         | <i>agaV</i>   | <b>3.3</b> | PTS system, mannose/fructose/sorbose family, IIB component          |

|               |              |            |                                                                                            |
|---------------|--------------|------------|--------------------------------------------------------------------------------------------|
| M5005_Spy0523 |              | <b>2.9</b> | PTS system, mannose/fructose-specific component IIA                                        |
| M5005_Spy0569 | <i>sagH</i>  | <b>1.6</b> | Streptolysin S biosynthesis, permease protein                                              |
| M5005_Spy0570 | <i>sagl</i>  | <b>1.7</b> | ABC-type multidrug transport system, permease component                                    |
| M5005_Spy0745 |              | <b>1.5</b> | ABC transporter permease subunit                                                           |
| M5005_Spy0746 |              | <b>2.0</b> | ABC transporter ATPase subunit                                                             |
| M5005_Spy0826 | <i>potA</i>  | <b>1.8</b> | ABC-type spermidine/putrescine transport system, ATPase component                          |
| M5005_Spy0827 | <i>potB</i>  | <b>1.9</b> | ABC-type spermidine/putrescine transport system, permease component I                      |
| M5005_Spy0828 | <i>potC</i>  | <b>1.5</b> | ABC-type spermidine/putrescine transport system, permease component II                     |
| M5005_Spy0829 | <i>potD</i>  | <b>1.8</b> | spermidine/putrescine ABC transporter substrate-binding protein                            |
| M5005_Spy0965 |              | <b>2.1</b> | Predicted permease                                                                         |
| M5005_Spy1059 | <i>malF</i>  | <b>2.0</b> | Maltose ABC-type transport system, permease component                                      |
| M5005_Spy1086 |              | <b>3.9</b> | Nicotinamide mononucleotide transporter                                                    |
| M5005_Spy1308 |              | <b>1.9</b> | ABC sugar transporter substrate-binding subunit                                            |
| M5005_Spy1309 |              | <b>2.8</b> | ABC sugar transporter, permease component                                                  |
| M5005_Spy1310 |              | <b>2.3</b> | ABC sugar transporter, permease component                                                  |
| M5005_Spy1372 | <i>proB</i>  | <b>2.8</b> | ABC transporter permease subunit                                                           |
| M5005_Spy1373 |              | <b>1.8</b> | ABC transporter subunit                                                                    |
| M5005_Spy1470 | <i>ecsB</i>  | <b>1.8</b> | Putative ABC-type exoprotein transport system, permease component                          |
| M5005_Spy1471 |              | <b>1.7</b> | ABC transporter, ATPase component                                                          |
| M5005_Spy1481 | <i>manN</i>  | <b>1.6</b> | PTS system mannose-specific transporter subunit IID                                        |
| M5005_Spy1521 | <i>cbiO</i>  | <b>1.8</b> | ABC cobalt transporter, ATP-binding subunit                                                |
| M5005_Spy1522 | <i>cbiQ</i>  | <b>1.7</b> | ABC cobalt transporter, permease subunit                                                   |
| M5005_Spy1524 | <i>cycC</i>  | <b>1.8</b> | ABC transporter subunit                                                                    |
| M5005_Spy1525 | <i>cycD</i>  | <b>2.8</b> | ABC transporter subunit                                                                    |
| M5005_Spy1526 | <i>fhuC</i>  | <b>3.0</b> | ABC transporter, ATP-binding component of iron-siderophores subunit                        |
| M5005_Spy1527 | <i>fhuB2</i> | <b>2.4</b> | ABC transporter cobalamin/Fe <sup>3+</sup> -siderophores transport systems, ATPase subunit |
| M5005_Spy1528 | <i>fhuD2</i> | <b>2.6</b> | ABC heme transporter, heme-binding subunit                                                 |
| M5005_Spy1529 | <i>shp</i>   | <b>3.1</b> | Cell surface heme-binding protein Shp                                                      |
| M5005_Spy1530 |              | <b>2.2</b> | Heme uptake protein                                                                        |
| M5005_Spy1744 |              | <b>2.2</b> | PTS system, IIC component                                                                  |
| M5005_Spy1745 |              | <b>2.1</b> | PTS system, IIB component                                                                  |
| M5005_Spy1746 |              | <b>1.9</b> | PTS system, IIA component                                                                  |

### Virulence

|               |               |            |                                                                                                   |
|---------------|---------------|------------|---------------------------------------------------------------------------------------------------|
| M5005_Spy0205 | <i>fasC</i>   | <b>1.7</b> | Histidine kinase; Fas (fibronectin/fibrinogen binding/haemolytic activity/streptokinase regulator |
| M5005_Spy0206 | <i>fasA</i>   | <b>1.6</b> | Response regulator                                                                                |
| M5005_Spy0385 |               | <b>2.1</b> | Acute rheumatic fever streptococcal myosin cross-reactive protein                                 |
| M5005_Spy0565 | <i>sagD</i>   | <b>1.8</b> | Streptolysin S biosynthesis scaffold/docking protein                                              |
| M5005_Spy0566 | <i>sagE</i>   | <b>1.8</b> | Streptolysin S biosynthesis protease associated                                                   |
| M5005_Spy0567 | <i>sagF</i>   | <b>1.7</b> | Streptolysin S biosynthesis, SagF protein                                                         |
| M5005_Spy0568 | <i>sagG</i>   | <b>1.7</b> | Streptolysin S biosynthesis, ATP-binding export protein                                           |
| M5005_Spy0571 |               | <b>1.8</b> | Predicted extracellular nuclease                                                                  |
| M5005_Spy0880 | <i>hlyIII</i> | <b>4.9</b> | Putative hemolysin III-related/erythrocyte lysis                                                  |

#### D. Down-regulated genes during stationary phase

| Locus tag                                       | Gene          | Fold change | Function                                                     |
|-------------------------------------------------|---------------|-------------|--------------------------------------------------------------|
| <b>Amino acid metabolism and transport</b>      |               |             |                                                              |
| M5005_Spy0014                                   |               | <b>-1.8</b> | Putative amino acid transporter                              |
| <b>Cell wall, membrane, envelope biogenesis</b> |               |             |                                                              |
| M5005_Spy0010                                   |               | <b>-1.5</b> | Beta lactamase                                               |
| M5005_Spy0017                                   | <i>sibA</i>   | <b>-3.3</b> | Protein with a CHAP domain. Putative amidase                 |
| M5005_Spy0303                                   | <i>glr</i>    | <b>-1.8</b> | Glutamate racemase; required for peptidoglycan synthesis     |
| M5005_Spy0425                                   |               | <b>-1.5</b> | Glycosyltransferase; cell envelope biogenesis                |
| M5005_Spy0533                                   |               | <b>-1.6</b> | Metallo-beta-lactamase superfamily protein                   |
| M5005_Spy0664                                   | <i>mur1.2</i> | <b>-3.6</b> | Mannosyl-glycoprotein endo-beta-N-acetylglucosaminidase      |
| M5005_Spy0687                                   | <i>mvaS.1</i> | <b>-1.6</b> | HMG-CoA synthase; mevalonate pathway                         |
| M5005_Spy0734                                   | <i>cpsFO</i>  | <b>-1.5</b> | Glucose-1-phosphate thymidyltransferase, short form          |
| M5005_Spy0735                                   | <i>cpsFP</i>  | <b>-1.6</b> | dTDP-4-dehydrorhamnose 3,5-epimerase                         |
| M5005_Spy0817                                   | <i>dacA1</i>  | <b>-1.9</b> | D-alanyl-D-alanine carboxypeptidase                          |
| M5005_Spy0818                                   |               | <b>-2.3</b> | Polysaccharide deacetylase                                   |
| M5005_Spy0875                                   | <i>srtA</i>   | <b>-1.8</b> | Sortase; cysteine transpeptidase                             |
| M5005_Spy1160                                   |               | <b>-1.8</b> | Penicillin-binding protein                                   |
| M5005_Spy1753                                   | <i>pbp2A</i>  | <b>-1.6</b> | Monofunctional biosynthetic peptidoglycan transglycosylase   |
| <b>DNA processing and metabolism</b>            |               |             |                                                              |
| M5005_Spy0019                                   | <i>recO</i>   | <b>-2.8</b> | DNA repair protein RecO                                      |
| M5005_Spy0093                                   |               | <b>-3.0</b> | Adenine-specific DNA methylase                               |
| M5005_Spy0294                                   |               | <b>-3.1</b> | Transposase                                                  |
| M5005_Spy0439                                   | <i>smc</i>    | <b>-1.6</b> | Structural maintenance of chromosomes (SMC) protein          |
| M5005_Spy0457                                   |               | <b>-1.6</b> | Plasmid stabilization protein                                |
| M5005_Spy0678                                   |               | <b>-2.1</b> | Putative endonuclease                                        |
| M5005_Spy0708                                   | <i>ung</i>    | <b>-1.7</b> | Uracil DNA glycosylase                                       |
| M5005_Spy0791                                   | <i>uvrC</i>   | <b>-2.1</b> | Nuclease subunit of the ABC excinuclease; subunit C          |
| M5005_Spy0862                                   | <i>tdk2</i>   | <b>-2.5</b> | Thymidine kinase                                             |
| M5005_Spy0874                                   | <i>gyrA</i>   | <b>-2.2</b> | DNA gyrase                                                   |
| M5005_Spy1146                                   | <i>holA</i>   | <b>-2.1</b> | DNA polymerase III, delta subunit                            |
| M5005_Spy1159                                   | <i>recR</i>   | <b>-1.7</b> | Recombinational DNA repair protein (RecF pathway)            |
| M5005_Spy1320                                   | <i>recX</i>   | <b>-2.0</b> | Regulator of recombination                                   |
| M5005_Spy1351                                   |               | <b>-2.2</b> | Nucleic acid methyltransferase                               |
| M5005_Spy1564                                   |               | <b>-1.7</b> | Ribonuclease HII                                             |
| M5005_Spy1719                                   | <i>emm1.0</i> | <b>-1.8</b> | Chromosome segregation ATPase                                |
| M5005_Spy1796                                   |               | <b>-1.8</b> | Putative endonuclease involved in recombination              |
| M5005_Spy1799                                   | <i>recA</i>   | <b>-1.8</b> | DNA repair and recombination protein RecA                    |
| M5005_Spy1854                                   |               | <b>-1.8</b> | Protein containing an S4 domain; it might interact with RecF |
| M5005_Spy1866                                   | <i>parB</i>   | <b>-2.6</b> | Chromosome partitioning protein                              |
| <b>Function unknown</b>                         |               |             |                                                              |

|                              |              |             |                                                                    |
|------------------------------|--------------|-------------|--------------------------------------------------------------------|
| M5005_Spy0100                | <i>trx.1</i> | <b>-2.5</b> | Thioredoxin-like protein                                           |
| M5005_Spy0260                |              | <b>-3.1</b> | Haloacid dehalogenase (HAD) superfamily of hydrolase proteins      |
| M5005_Spy0266                |              | <b>-2.3</b> | S-adenosylmethionine-dependent methyltransferase                   |
| M5005_Spy0279                | <i>lemA</i>  | <b>-1.7</b> | Transmembrane protein similar to LemA                              |
| M5005_Spy0300                |              | <b>-3.3</b> | Putative HD superfamily hydrolase                                  |
| M5005_Spy0301                |              | <b>-2.4</b> | Putative bacterial BAX inhibitor                                   |
| M5005_Spy0319                | <i>ppaC</i>  | <b>-1.8</b> | Putative manganese-dependent inorganic pyrophosphatase             |
| M5005_Spy0381                |              | <b>-1.9</b> | Putative RNA-binding protein                                       |
| M5005_Spy0548                | <i>flaV</i>  | <b>-2.0</b> | Flavodoxin                                                         |
| M5005_Spy0552                |              | <b>-2.0</b> | Haloacid dehalogenase-like hydrolase                               |
| M5005_Spy0603                | <i>rgpAc</i> | <b>-1.7</b> | Putative glycosyltransferase                                       |
| M5005_Spy0672                |              | <b>-1.8</b> | Putative nucleotidyl transferase involved in tRNA repair           |
| M5005_Spy0731                |              | <b>-1.9</b> | Putative SAM-dependent methyltransferase                           |
| M5005_Spy0792                |              | <b>-2.2</b> | Protein belonging to the Nitroreductase-like family                |
| M5005_Spy0835                |              | <b>-4.1</b> | Haloacid dehalogenase (HAD) hydrolase                              |
| M5005_Spy0861                |              | <b>-4.1</b> | Tautomerase enzyme                                                 |
| M5005_Spy0876                |              | <b>-2.1</b> | Glyoxalase/Bleomycin resistance protein/Dioxygenase superfamily    |
| M5005_Spy0916                | <i>ylxM</i>  | <b>-3.3</b> | Putative DNA-binding protein                                       |
| M5005_Spy0944                |              | <b>-1.7</b> | Putative S-adenosylmethionine-dependent methyltransferase          |
| M5005_Spy1113                |              | <b>-1.6</b> | Signal transduction protein containing GAF and PtsI domains        |
| M5005_Spy1163                |              | <b>-1.9</b> | Putative small molecule binding protein (contains 3H domain)       |
| M5005_Spy1364                |              | <b>-1.5</b> | DEAD-box ATP-dependent RNA helicase                                |
| M5005_Spy1393                |              | <b>-1.8</b> | Haloacid dehalogenase-like hydrolase                               |
| M5005_Spy1476                |              | <b>-4.1</b> | Putative ATPase or kinase                                          |
| M5005_Spy1478                |              | <b>-1.8</b> | Haloacid dehalogenase-like hydrolase                               |
| M5005_Spy1608                |              | <b>-1.8</b> | Esterase/hydrolase                                                 |
| M5005_Spy1864                |              | <b>-2.1</b> | S-adenosyl-L-methionine (AdoMet)-dependent SPOUT methyltransferase |
| <b>Hypothetical proteins</b> |              |             |                                                                    |
| M5005_Spy0003                |              | <b>-2.3</b> | Hypothetical protein                                               |
| M5005_Spy0009                |              | <b>-2.1</b> | Hypothetical protein                                               |
| M5005_Spy0099                |              | <b>-3.1</b> | Hypothetical secreted protein                                      |
| M5005_Spy0115                |              | <b>-4.5</b> | Hypothetical protein                                               |
| M5005_Spy0122                |              | <b>-2.3</b> | PAS and HTH domains containing hypothetical protein                |
| M5005_Spy0241                | <i>rgpG</i>  | <b>-2.4</b> | Hypothetical protein                                               |
| M5005_Spy0267                |              | <b>-2.1</b> | Hypothetical protein                                               |
| M5005_Spy0268                |              | <b>-3.6</b> | Hypothetical protein                                               |
| M5005_Spy0281                |              | <b>-1.7</b> | Predicted metal-binding, possibly nucleic acid-binding protein     |
| M5005_Spy0302                |              | <b>-2.4</b> | Hypothetical protein                                               |
| M5005_Spy0329                |              | <b>-1.8</b> | Hypothetical protein                                               |
| M5005_Spy0358                |              | <b>-1.7</b> | Hypothetical protein                                               |
| M5005_Spy0458                |              | <b>-1.9</b> | Hypothetical protein                                               |
| M5005_Spy0461                |              | <b>-2.4</b> | Hypothetical protein                                               |
| M5005_Spy0479                |              | <b>-2.7</b> | Hypothetical protein                                               |

|                                               |             |             |                                            |
|-----------------------------------------------|-------------|-------------|--------------------------------------------|
| M5005_Spy0493                                 |             | <b>-2.2</b> | Hypothetical protein                       |
| M5005_Spy0515                                 |             | <b>-2.5</b> | Hypothetical protein                       |
| M5005_Spy0671                                 |             | <b>-2.0</b> | Hypothetical protein                       |
| M5005_Spy0676                                 |             | <b>-4.5</b> | Hypothetical protein                       |
| M5005_Spy0690                                 |             | <b>-2.1</b> | Hypothetical protein                       |
| M5005_Spy0702                                 |             | <b>-1.9</b> | Hypothetical protein                       |
| M5005_Spy0714                                 |             | <b>-2.1</b> | Hypothetical protein                       |
| M5005_Spy0721                                 |             | <b>-2.4</b> | Hypothetical protein                       |
| M5005_Spy0761                                 |             | <b>-1.6</b> | Hypothetical protein                       |
| M5005_Spy0846                                 |             | <b>-3.2</b> | Hypothetical protein                       |
| M5005_Spy0877                                 |             | <b>-2.2</b> | Hypothetical protein                       |
| M5005_Spy0922                                 |             | <b>-2.0</b> | Hypothetical protein                       |
| M5005_Spy0962                                 |             | <b>-2.7</b> | Hypothetical protein                       |
| M5005_Spy0994                                 |             | <b>-1.9</b> | Conserved hypothetical protein             |
| M5005_Spy1053                                 |             | <b>-2.9</b> | Hypothetical protein                       |
| M5005_Spy1054                                 |             | <b>-2.2</b> | Hypothetical protein                       |
| M5005_Spy1089                                 |             | <b>-3.5</b> | Hypothetical protein                       |
| M5005_Spy1093                                 |             | <b>-3.7</b> | Hypothetical protein                       |
| M5005_Spy1144                                 |             | <b>-2.4</b> | Hypothetical protein                       |
| M5005_Spy1192                                 |             | <b>-1.7</b> | Hypothetical protein                       |
| M5005_Spy1239                                 |             | <b>-3.0</b> | Hypothetical protein                       |
| M5005_Spy1258                                 |             | <b>-2.4</b> | Conserved hypothetical protein             |
| M5005_Spy1293                                 |             | <b>-1.9</b> | Hypothetical protein                       |
| M5005_Spy1295                                 |             | <b>-3.2</b> | Hypothetical protein                       |
| M5005_Spy1296                                 |             | <b>-4.1</b> | Hypothetical protein                       |
| M5005_Spy1321                                 |             | <b>-1.8</b> | Hypothetical protein                       |
| M5005_Spy1353                                 |             | <b>-1.8</b> | Hypothetical protein                       |
| M5005_Spy1361                                 | <i>aapA</i> | <b>-2.1</b> | Hypothetical protein                       |
| M5005_Spy1390                                 |             | <b>-1.5</b> | Hypothetical protein                       |
| M5005_Spy1394                                 |             | <b>-2.0</b> | Hypothetical protein                       |
| M5005_Spy1411                                 |             | <b>-1.7</b> | Hypothetical protein                       |
| M5005_Spy1413                                 |             | <b>-2.4</b> | Hypothetical protein                       |
| M5005_Spy1567                                 |             | <b>-1.8</b> | Hypothetical membrane protein              |
| M5005_Spy1594                                 |             | <b>-2.7</b> | Hypothetical protein                       |
| M5005_Spy1598                                 |             | <b>-1.5</b> | Hypothetical membrane protein              |
| M5005_Spy1729                                 |             | <b>-3.0</b> | Hypothetical protein                       |
| M5005_Spy1730                                 |             | <b>-2.5</b> | DUF4298 superfamily. Unknown function      |
| M5005_Spy1757                                 |             | <b>-1.8</b> | Hypothetical protein                       |
| M5005_Spy1794                                 |             | <b>-1.6</b> | Hypothetical membrane protein              |
| M5005_Spy1797                                 |             | <b>-2.0</b> | Hypothetical protein                       |
| M5005_Spy1859                                 |             | <b>-4.4</b> | Hypothetical protein                       |
| <b>Inorganic ion transport and metabolism</b> |             |             |                                            |
| M5005_Spy0598                                 | <i>mscL</i> | <b>-2.1</b> | Large-conductance mechanosensitive channel |

|                                             |               |             |                                                                                          |
|---------------------------------------------|---------------|-------------|------------------------------------------------------------------------------------------|
| M5005_Spy0985                               | <i>phnA</i>   | <b>-1.8</b> | Uncharacterized Zn-ribbon-containing protein involved in phosphonate metabolism          |
| <b>Metabolism - Carbon</b>                  |               |             |                                                                                          |
| M5005_Spy0194                               | <i>gpsA</i>   | <b>-1.6</b> | Glycerol-3-phosphate dehydrogenase                                                       |
| M5005_Spy0233                               | <i>plr</i>    | <b>-2.2</b> | Glyceraldehyde 3-phosphate dehydrogenase                                                 |
| M5005_Spy0790                               | <i>gabD</i>   | <b>-2.4</b> | Succinate-semialdehyde dehydrogenase                                                     |
| M5005_Spy1056                               | <i>malM</i>   | <b>-1.8</b> | 4-alpha-glucanotransferase                                                               |
| M5005_Spy1119                               | <i>gapN</i>   | <b>-5.9</b> | Putative aldehyde dehydrogenase                                                          |
| M5005_Spy1376                               | <i>tal</i>    | <b>-2.5</b> | Fructose-6-P aldolase/transaldolase                                                      |
| M5005_Spy1395                               | <i>lacD.1</i> | <b>-4.0</b> | Tagatose-6-phosphate aldolase; Lac.1 (cluster I) tagatose pathway                        |
| M5005_Spy1396                               | <i>lacC.1</i> | <b>-4.4</b> | Tagatose-6-phosphate kinase; Lac.1 (cluster I) tagatose pathway                          |
| M5005_Spy1397                               | <i>lacB.1</i> | <b>-3.6</b> | Galactose-6-phosphate isomerase subunit LacB.1; Lac.1 (cluster I) tagatose pathway       |
| M5005_Spy1398                               | <i>lacA.1</i> | <b>-3.3</b> | Galactose-6-phosphate isomerase subunit LacA.1; Lac.1 (cluster I) tagatose pathway       |
| M5005_Spy1602                               |               | <b>-1.7</b> | Dihydroxyacetone kinase family                                                           |
| M5005_Spy1632                               | <i>lacG</i>   | <b>-5.4</b> | Phospho-beta-galactosidase                                                               |
| M5005_Spy1636                               | <i>lacC.2</i> | <b>-2.8</b> | Tagatose-6-phosphate kinase; Lac.2 (cluster II) tagatose pathway                         |
| M5005_Spy1637                               | <i>lacB.2</i> | <b>-3.3</b> | Galactose-6-phosphate isomerase subunit LacB.2; Lac.2 (cluster II) tagatose pathway      |
| M5005_Spy1638                               | <i>lacA.2</i> | <b>-4.1</b> | Galactose-6-phosphate isomerase subunit LacA.2; Lac.2 (cluster II) tagatose pathway      |
| M5005_Spy1681                               | <i>dexB</i>   | <b>-1.8</b> | Glucan 1,6-alpha-glucosidase                                                             |
| M5005_Spy1783                               | <i>dexS</i>   | <b>-3.2</b> | Putative alpha amylase/glycosidase                                                       |
| M5005_Spy1843                               |               | <b>-2.7</b> | Transglycosylase                                                                         |
| <b>Metabolism - Lipids</b>                  |               |             |                                                                                          |
| M5005_Spy0020                               | <i>plsX</i>   | <b>-2.2</b> | Putative glycerol-3-phosphate acyltransferase PlsX                                       |
| M5005_Spy1740                               |               | <b>-1.7</b> | Phosphatidylglycerophosphatase A, involved in cardiolipin synthesis                      |
| M5005_Spy1847                               | <i>pgsA</i>   | <b>-1.9</b> | CDP-diacylglycerol--glycerol-3-phosphate 3-phosphatidyltransferase; cardiolipin synthase |
| <b>Metabolism - Coenzymes and cofactors</b> |               |             |                                                                                          |
| M5005_Spy0264                               |               | <b>-1.7</b> | Predicted HD superfamily hydrolase involved in NAD metabolism                            |
| M5005_Spy0292                               |               | <b>-1.8</b> | Aminodeoxychorismate lyase                                                               |
| M5005_Spy0689                               | <i>dyr</i>    | <b>-2.6</b> | Dihydrofolate reductase (DHFR)                                                           |
| M5005_Spy0848                               | <i>ppnK</i>   | <b>-1.7</b> | Polyphosphate/ATP-dependent NAD kinase                                                   |
| M5005_Spy0872                               | <i>nox</i>    | <b>-2.0</b> | NADH oxidase                                                                             |
| M5005_Spy0923                               | <i>pdxK</i>   | <b>-2.0</b> | Pyridoxamine kinase                                                                      |
| M5005_Spy0945                               | <i>coaA</i>   | <b>-2.3</b> | Pantothenate kinase, coenzyme A (CoA) biosynthetic pathway                               |
| M5005_Spy1108                               | <i>metK2</i>  | <b>-1.9</b> | S-adenosylmethionine synthetase                                                          |
| <b>Metabolism - Fermentation pathways</b>   |               |             |                                                                                          |
| M5005_Spy0040                               | <i>adhA</i>   | <b>-2.9</b> | Alcohol dehydrogenase                                                                    |
| M5005_Spy0094                               | <i>ackA</i>   | <b>-2.7</b> | Acetate kinase                                                                           |
| M5005_Spy0851                               | <i>pta</i>    | <b>-1.6</b> | Phosphotransacetylase                                                                    |
| <b>Nucleotide metabolism and transport</b>  |               |             |                                                                                          |
| M5005_Spy0012                               | <i>hpt</i>    | <b>-2.6</b> | Hypoxanthine phosphoribosyl transferase                                                  |
| M5005_Spy0199                               |               | <b>-2.1</b> | deoxyuridine 5'-triphosphate nucleotidohydrolase (dut)                                   |
| M5005_Spy0263                               | <i>nadD</i>   | <b>-1.8</b> | Nicotinate (nicotinamide) nucleotide adenylyltransferase                                 |
| M5005_Spy0327                               | <i>upp</i>    | <b>-2.9</b> | Uracil phosphoribosyltransferase                                                         |

|                       |               |             |                                                      |
|-----------------------|---------------|-------------|------------------------------------------------------|
| M5005_Spy0330         | <i>tmk</i>    | <b>-1.5</b> | Thymidylate kinase                                   |
| M5005_Spy0377         | <i>pyrH</i>   | <b>-2.5</b> | Uridylate (UMP) kinase                               |
| M5005_Spy0688         | <i>thyA</i>   | <b>-2.1</b> | Thymidylate synthase                                 |
| M5005_Spy0857         | <i>guaC</i>   | <b>-2.6</b> | Putative guanosine monophosphate reductase           |
| M5005_Spy0925         | <i>rnhB</i>   | <b>-1.7</b> | Anaerobic ribonucleoside triphosphate reductase      |
| M5005_Spy1116         | <i>udk</i>    | <b>-2.6</b> | Uridine monophosphate kinase                         |
| M5005_Spy1124         | <i>nrdF.2</i> | <b>-1.7</b> | Ribonucleotide reductase, beta subunit               |
| M5005_Spy0919         | <i>guaA</i>   | <b>-1.9</b> | GMP synthase                                         |
| M5005_Spy1341         | <i>gmk</i>    | <b>-2.3</b> | Guanylate kinase                                     |
| M5005_Spy1587         | <i>udp</i>    | <b>-1.7</b> | Uridine phosphorylase                                |
| <b>Other</b>          |               |             |                                                      |
| M5005_Spy1326         | <i>comFC</i>  | <b>-2.4</b> | ComF-family protein involved in competence           |
| M5005_Spy1631         | <i>salA</i>   | <b>-3.4</b> | Type-A lantibiotic                                   |
| M5005_Spy1809         | <i>uviB</i>   | <b>-2.6</b> | Enterocin A Immunity                                 |
| <b>Phage proteins</b> |               |             |                                                      |
| M5005_Spy1052         | <i>int.1</i>  | <b>-2.0</b> | Phage integrase                                      |
| M5005_Spy1193         |               | <b>-1.6</b> | Lambdoid phage 5005.2 protein                        |
| M5005_Spy1197         |               | <b>-3.8</b> | Lambdoid phage 5005.2 protein                        |
| M5005_Spy1202         |               | <b>-2.7</b> | Lambdoid phage 5005.2 protein                        |
| M5005_Spy1203         |               | <b>-2.4</b> | Lambdoid phage 5005.2 protein                        |
| M5005_Spy1204         |               | <b>-2.2</b> | Lambdoid phage 5005.2 protein                        |
| M5005_Spy1206         |               | <b>-2.7</b> | Lambdoid phage 5005.2 protein                        |
| M5005_Spy1209         |               | <b>-2.7</b> | Lambdoid phage 5005.2 protein                        |
| M5005_Spy1214         |               | <b>-2.1</b> | Lambdoid phage 5005.2 protein                        |
| M5005_Spy1215         |               | <b>-1.8</b> | Lambdoid phage 5005.2 protein                        |
| M5005_Spy1416         |               | <b>-2.7</b> | Lambdoid phage 5005.3 protein                        |
| M5005_Spy1417         |               | <b>-3.5</b> | Conserved hypothetical membrane phage 5005.3 protein |
| M5005_Spy1418         |               | <b>-2.8</b> | Lambdoid phage 5005.3 protein                        |
| M5005_Spy1419         |               | <b>-3.4</b> | Lambdoid phage 5005.3 protein                        |
| M5005_Spy1420         |               | <b>-2.8</b> | Lambdoid phage 5005.3 protein                        |
| M5005_Spy1421         |               | <b>-3.0</b> | Lambdoid phage 5005.3 protein                        |
| M5005_Spy1422         |               | <b>-2.4</b> | Lambdoid phage 5005.3 protein                        |
| M5005_Spy1423         |               | <b>-2.2</b> | Lambdoid phage 5005.3 protein                        |
| M5005_Spy1424         |               | <b>-2.4</b> | Lambdoid phage 5005.3 protein                        |
| M5005_Spy1426         |               | <b>-2.2</b> | Lambdoid phage 5005.3 protein                        |
| M5005_Spy1428         |               | <b>-2.4</b> | Lambdoid phage 5005.3 protein                        |
| M5005_Spy1429         |               | <b>-2.9</b> | Lambdoid phage 5005.3 protein                        |
| M5005_Spy1430         |               | <b>-2.5</b> | Lambdoid phage 5005.3 protein                        |
| M5005_Spy1431         |               | <b>-2.6</b> | Lambdoid phage 5005.3 protein                        |
| M5005_Spy1432         |               | <b>-2.5</b> | Lambdoid phage 5005.3 protein                        |
| M5005_Spy1433         |               | <b>-2.8</b> | Lambdoid phage 5005.3 protein                        |
| M5005_Spy1434         |               | <b>-3.0</b> | Lambdoid phage 5005.3 protein                        |
| M5005_Spy1435         |               | <b>-3.0</b> | Lambdoid phage 5005.3 protein                        |

|                                                                     |              |             |                                                                                         |
|---------------------------------------------------------------------|--------------|-------------|-----------------------------------------------------------------------------------------|
| M5005_Spy1437                                                       |              | <b>-3.0</b> | Lambdoid phage 5005.3 protein                                                           |
| M5005_Spy1438                                                       |              | <b>-2.7</b> | Lambdoid phage 5005.3 protein                                                           |
| M5005_Spy1439                                                       |              | <b>-2.4</b> | Lambdoid phage 5005.3 protein                                                           |
| M5005_Spy1440                                                       |              | <b>-2.7</b> | Lambdoid phage 5005.3 protein                                                           |
| M5005_Spy1441                                                       |              | <b>-3.0</b> | Lambdoid phage 5005.3 protein                                                           |
| M5005_Spy1443                                                       |              | <b>-2.1</b> | Lambdoid phage 5005.3 protein                                                           |
| M5005_Spy1444                                                       |              | <b>-2.5</b> | Lambdoid phage 5005.3 protein                                                           |
| M5005_Spy1447                                                       |              | <b>-2.1</b> | Lambdoid phage 5005.3 protein. Superfamily II DNA/RNA helicases                         |
| M5005_Spy1448                                                       |              | <b>-2.3</b> | Putative lambdoid phage 5005.3 nuclease                                                 |
| M5005_Spy1449                                                       |              | <b>-1.8</b> | Lambdoid phage 5005.3 associated DNA primase                                            |
| M5005_Spy1450                                                       |              | <b>-1.7</b> | Lambdoid phage 5005.3 associated DNA_Pol_A superfamily                                  |
| M5005_Spy1451                                                       |              | <b>-1.7</b> | Lambdoid phage 5005.3 protein                                                           |
| M5005_Spy1452                                                       |              | <b>-2.1</b> | Lambdoid phage 5005.3 protein                                                           |
| M5005_Spy1454                                                       |              | <b>-1.8</b> | Lambdoid phage 5005.3 protein                                                           |
| <b>Posttranslational modification, protein turnover, chaperones</b> |              |             |                                                                                         |
| M5005_Spy0114                                                       |              | <b>-3.4</b> | Sortase (surface protein transpeptidase)                                                |
| M5005_Spy0371                                                       | <i>cypB</i>  | <b>-2.7</b> | Peptidyl-prolyl cis-trans isomerase (rotamase) - cyclophilin family                     |
| M5005_Spy0866                                                       |              | <b>-1.7</b> | Acetyltransferase                                                                       |
| M5005_Spy1122                                                       | <i>nrdH</i>  | <b>-3.3</b> | Glutaredoxin/thioredoxin; it might be associated with class Ib ribonucleotide reductase |
| M5005_Spy1240                                                       | <i>clpE</i>  | <b>-1.6</b> | Clp protease subunit                                                                    |
| M5005_Spy1382                                                       |              | <b>-3.2</b> | Peptidase propeptide                                                                    |
| M5005_Spy1475                                                       |              | <b>-2.7</b> | Acetyltransferase; similar to histone acetyltransferase HPA2                            |
| M5005_Spy1593                                                       |              | <b>-1.5</b> | Metal-dependent protease; putative molecular chaperone                                  |
| M5005_Spy1762                                                       | <i>groES</i> | <b>-2.0</b> | Co-chaperonin GroES (HSP10)                                                             |
| M5005_Spy1782                                                       | <i>pepO</i>  | <b>-1.9</b> | Predicted metalloendopeptidase                                                          |
| M5005_Spy1850                                                       |              | <b>-2.0</b> | Putative Zn-dependent peptidase                                                         |
| M5005_Spy1865                                                       | <i>htrA</i>  | <b>-3.0</b> | Trypsin-like serine protease                                                            |
| <b>Replication, repair and cell division</b>                        |              |             |                                                                                         |
| M5005_Spy0008                                                       | <i>divIC</i> | <b>-1.8</b> | Septum formation initiation protein                                                     |
| M5005_Spy0011                                                       | <i>tisL</i>  | <b>-2.3</b> | Predicted ATPase of the PP-loop family implicated in cell cycle control                 |
| M5005_Spy0506                                                       | <i>ftsW</i>  | <b>-1.7</b> | Cell division protein FtsW                                                              |
| M5005_Spy1352                                                       |              | <b>-4.8</b> | Cell division protein GpsB                                                              |
| <b>General stress</b>                                               |              |             |                                                                                         |
| M5005_Spy0483                                                       |              | <b>-2.6</b> | Putative stress responsive transcriptional regulator                                    |
| M5005_Spy0778                                                       | <i>msrB</i>  | <b>-2.0</b> | Peptide methionine sulfoxide reductase MsrB                                             |
| M5005_Spy1241                                                       | <i>mutT</i>  | <b>-1.6</b> | Mutator mutT protein                                                                    |
| M5005_Spy1259                                                       | <i>dpr</i>   | <b>-3.3</b> | DNA starvation/stationary phase protection protein                                      |
| M5005_Spy1328                                                       |              | <b>-2.2</b> | IMPACT family protein involved in response to stress                                    |
| M5005_Spy1378                                                       | <i>npx</i>   | <b>-2.2</b> | NADH peroxidase                                                                         |
| M5005_Spy1514                                                       |              | <b>-2.2</b> | Universal stress protein                                                                |
| M5005_Spy1559                                                       | <i>trx</i>   | <b>-2.1</b> | Thioredoxin                                                                             |
| M5005_Spy1603                                                       | <i>asp</i>   | <b>-2.1</b> | Putative alkaline shock protein                                                         |



|                      |               |             |                                                                    |
|----------------------|---------------|-------------|--------------------------------------------------------------------|
| M5005_Spy1765        | <i>csp</i>    | <b>-1.7</b> | Cold-Shock Protein (CSP)                                           |
| <b>Transcription</b> |               |             |                                                                    |
| M5005_Spy0118        |               | <b>-3.4</b> | Putative LysR transcriptional regulator                            |
| M5005_Spy0138        | <i>nusG</i>   | <b>-1.9</b> | Transcription antitermination protein NusG                         |
| M5005_Spy0186        |               | <b>-2.1</b> | M trans-acting positive regulator (MGA) PRD domain protein         |
| M5005_Spy0239        | <i>mecA</i>   | <b>-1.7</b> | Negative regulator of genetic competence, sporulation and motility |
| M5005_Spy0269        |               | <b>-2.7</b> | Putative transcriptional regulator                                 |
| M5005_Spy0284        | <i>nrdR</i>   | <b>-1.7</b> | transcriptional regulator NrdR for ribonucleotide reductase genes  |
| M5005_Spy0293        | <i>greA</i>   | <b>-2.8</b> | Transcription elongation factor                                    |
| M5005_Spy0367        | <i>scaR</i>   | <b>-1.9</b> | Putative transcriptional regulator                                 |
| M5005_Spy0517        | <i>regR</i>   | <b>-1.6</b> | Putative transcriptional regulator                                 |
| M5005_Spy0654        |               | <b>-2.0</b> | Putative transcriptional regulator                                 |
| M5005_Spy0679        |               | <b>-2.9</b> | Putative RelA / SpoT                                               |
| M5005_Spy0680        |               | <b>-2.3</b> | Response regulator                                                 |
| M5005_Spy0681        |               | <b>-2.2</b> | Histidine kinase                                                   |
| M5005_Spy0701        | <i>cpsY</i>   | <b>-1.6</b> | Putative transcriptional regulator                                 |
| M5005_Spy0804        | <i>srtR</i>   | <b>-2.0</b> | Response regulator                                                 |
| M5005_Spy0805        | <i>srtK</i>   | <b>-1.7</b> | Histidine kinase                                                   |
| M5005_Spy0847        |               | <b>-2.2</b> | Putative RelA / SpoT                                               |
| M5005_Spy0917        |               | <b>-2.3</b> | Putative transcriptional regulator                                 |
| M5005_Spy0924        |               | <b>-2.0</b> | Putative transcriptional regulator                                 |
| M5005_Spy0947        | <i>ciaH</i>   | <b>-2.3</b> | Histidine kinase                                                   |
| M5005_Spy0948        | <i>ciaR</i>   | <b>-3.0</b> | Response regulator                                                 |
| M5005_Spy0959        | <i>spxA</i>   | <b>-1.5</b> | Transcriptional regulator SpxA                                     |
| M5005_Spy0991        |               | <b>-1.9</b> | Putative transcriptional regulator                                 |
| M5005_Spy1057        | <i>malR</i>   | <b>-2.0</b> | Putative transcriptional regulator                                 |
| M5005_Spy1223        |               | <b>-2.2</b> | HU/IHF-like transcriptional protein                                |
| M5005_Spy1277        | <i>ahrC.2</i> | <b>-3.3</b> | Arginine repressor                                                 |
| M5005_Spy1340        |               | <b>-1.6</b> | DNA-directed RNA polymerase, omega subunit                         |
| M5005_Spy1377        |               | <b>-2.0</b> | M regulator protein trans-acting positive regulator                |
| M5005_Spy1402        | <i>lacR.1</i> | <b>-3.2</b> | Transcriptional regulator of sugar metabolism                      |
| M5005_Spy1412        | <i>nusA</i>   | <b>-1.8</b> | Transcription elongation factor                                    |
| M5005_Spy1474        | <i>lytR</i>   | <b>-1.7</b> | Transcriptional regulator                                          |
| M5005_Spy1583        |               | <b>-2.1</b> | Putative transcriptional regulator                                 |
| M5005_Spy1611        | <i>rpoE</i>   | <b>-3.4</b> | DNA-directed RNA polymerase, delta subunit                         |
| M5005_Spy1625        | <i>salR</i>   | <b>-1.5</b> | Signal transduction response regulator                             |
| M5005_Spy1626        | <i>salk</i>   | <b>-1.6</b> | Signal transduction histidine kinase                               |
| M5005_Spy1639        | <i>lacR.2</i> | <b>-4.5</b> | Transcriptional regulator of sugar metabolism                      |
| M5005_Spy1640        |               | <b>-1.7</b> | Putative transcriptional regulator                                 |
| M5005_Spy1764        | <i>ctsR</i>   | <b>-1.7</b> | Transcriptional repressor of stress genes                          |
| M5005_Spy1779        |               | <b>-1.6</b> | DNA-binding transcriptional activator of the SARP family           |
| M5005_Spy1785        |               | <b>-2.5</b> | Putative transcriptional regulator                                 |
| M5005_Spy1798        | <i>spxA</i>   | <b>-2.3</b> | Transcriptional regulator                                          |

|                    |              |             |                                                                                       |
|--------------------|--------------|-------------|---------------------------------------------------------------------------------------|
| M5005_Spy1807      | <i>argR2</i> | <b>-1.9</b> | Arginine repressor                                                                    |
| M5005_Spy1848      |              | <b>-1.5</b> | Putative transcriptional regulator                                                    |
| <b>Translation</b> |              |             |                                                                                       |
| M5005_Spy0005      | <i>pth</i>   | <b>-1.8</b> | Peptidyl-tRNA hydrolase                                                               |
| M5005_Spy0007      | <i>hsp15</i> | <b>-2.2</b> | Ribosome-associated heat shock protein (Hsp15)                                        |
| M5005_Spy0043      | <i>rpsJ</i>  | <b>-3.0</b> | 30S ribosomal protein S10                                                             |
| M5005_Spy0044      | <i>rplC</i>  | <b>-2.3</b> | 50S ribosomal protein L3                                                              |
| M5005_Spy0101      |              | <b>-1.6</b> | Putative tRNA binding domain-containing protein                                       |
| M5005_Spy0207      | <i>rnpA</i>  | <b>-2.0</b> | Ribonuclease P protein component                                                      |
| M5005_Spy0211      | <i>rpmH</i>  | <b>-2.9</b> | 50S ribosomal protein L34                                                             |
| M5005_Spy0261      |              | <b>-2.4</b> | Ribosome biogenesis GTPase                                                            |
| M5005_Spy0262      |              | <b>-2.5</b> | Predicted RNA-binding protein, possibly ribosomal protein                             |
| M5005_Spy0265      |              | <b>-1.9</b> | Putative ribosome-associated protein                                                  |
| M5005_Spy0278      | <i>gidB</i>  | <b>-2.4</b> | 16S rRNA methyltransferase GidB                                                       |
| M5005_Spy0312      |              | <b>-1.8</b> | 23S rRNA methyltransferase                                                            |
| M5005_Spy0375      | <i>rplA</i>  | <b>-1.7</b> | 50S ribosomal protein L1                                                              |
| M5005_Spy0380      | <i>rrf</i>   | <b>-1.9</b> | Ribosome recycling factor (RRF)                                                       |
| M5005_Spy0438      | <i>rnc</i>   | <b>-2.4</b> | Ribonuclease III                                                                      |
| M5005_Spy0456      | <i>relB</i>  | <b>-2.0</b> | RelB antitoxin                                                                        |
| M5005_Spy0462      | <i>asnS</i>  | <b>-1.9</b> | Asparaginyl-tRNA synthetase                                                           |
| M5005_Spy0495      | <i>lysS</i>  | <b>-1.5</b> | Lys_tRNA synthetase                                                                   |
| M5005_Spy0498      |              | <b>-2.1</b> | tRNA deacylase; it deacylates mischarged tRNAs                                        |
| M5005_Spy0530      | <i>prfB</i>  | <b>-1.6</b> | Peptide chain release factor 2                                                        |
| M5005_Spy0546      | <i>rpmE</i>  | <b>-2.2</b> | 50S ribosomal protein L31 type B                                                      |
| M5005_Spy0551      | <i>rplS</i>  | <b>-2.2</b> | 50S ribosomal protein L19                                                             |
| M5005_Spy0587      | <i>pheS</i>  | <b>-1.8</b> | Phenylalanyl-tRNA synthetase                                                          |
| M5005_Spy0619      | <i>infC</i>  | <b>-2.9</b> | IF-3 translation initiation factor                                                    |
| M5005_Spy0620      | <i>rpl36</i> | <b>-2.6</b> | 50S ribosomal protein L35                                                             |
| M5005_Spy0621      | <i>rplT</i>  | <b>-2.0</b> | 50S ribosomal protein L20                                                             |
| M5005_Spy0655      | <i>rimM</i>  | <b>-2.3</b> | 16S rRNA-processing protein RimM                                                      |
| M5005_Spy0677      | <i>fms</i>   | <b>-3.6</b> | Polypeptide deformylase                                                               |
| M5005_Spy0715      | <i>rpsA</i>  | <b>-3.0</b> | 30S ribosomal protein S1                                                              |
| M5005_Spy0776      | <i>lepA</i>  | <b>-1.5</b> | Elongation Factor 4 (EF4)                                                             |
| M5005_Spy0795      | <i>rplJ</i>  | <b>-3.1</b> | 50S ribosomal protein L10                                                             |
| M5005_Spy0863      | <i>prfA</i>  | <b>-1.7</b> | Peptide chain release factor                                                          |
| M5005_Spy0864      | <i>hemK</i>  | <b>-1.6</b> | S-adenosylmethionine-dependent methyltransferase of polypeptide chain release factors |
| M5005_Spy0865      |              | <b>-1.7</b> | Putative translation factor                                                           |
| M5005_Spy0915      | <i>ffh</i>   | <b>-1.6</b> | Signal recognition particle GTPase                                                    |
| M5005_Spy0921      |              | <b>-2.9</b> | Elongation factor 3 (EF-3)                                                            |
| M5005_Spy0946      | <i>rpsT</i>  | <b>-2.6</b> | 30S ribosomal protein S20                                                             |
| M5005_Spy1105      |              | <b>-1.8</b> | Acetyltransferase, including N-acetylases of ribosomal proteins                       |
| M5005_Spy1134      |              | <b>-1.7</b> | Methylase of polypeptide chain release factors                                        |
| M5005_Spy1140      | <i>queA</i>  | <b>-1.6</b> | Queuosine (Q) biosynthesis protein                                                    |

|                  |               |             |                                                                                |
|------------------|---------------|-------------|--------------------------------------------------------------------------------|
| M5005_Spy1294    |               | <b>-1.8</b> | Acetyltransferase, including N-acetylases of ribosomal proteins                |
| M5005_Spy1325    | <i>raiA</i>   | <b>-1.9</b> | Ribosome-associated inhibitor A (RaiA)                                         |
| M5005_Spy1410    |               | <b>-1.6</b> | Ribosomal protein HS6-type (S12/L30/L7a)                                       |
| M5005_Spy1468    | <i>trmB</i>   | <b>-1.5</b> | tRNA (guanine-N(7)-)-methyltransferase                                         |
| M5005_Spy1547    | <i>efp</i>    | <b>-1.6</b> | Elongation factor P                                                            |
| M5005_Spy1555    | <i>rpsF</i>   | <b>-1.8</b> | 30S ribosomal protein S6                                                       |
| M5005_Spy1612    | <i>ropA</i>   | <b>-2.7</b> | Trigger factor (TF) protein; molecular chaperone                               |
| M5005_Spy1646    | <i>rpsI</i>   | <b>-1.8</b> | 30S ribosomal protein S9/S16                                                   |
| M5005_Spy1647    | <i>rplM</i>   | <b>-2.8</b> | 50S ribosomal protein L13                                                      |
| M5005_Spy1652    |               | <b>-1.6</b> | rRNA methylase                                                                 |
| M5005_Spy1666    | <i>rpsO</i>   | <b>-2.5</b> | 30S ribosomal protein S15                                                      |
| M5005_Spy1669    | <i>def</i>    | <b>-2.4</b> | Polypeptide deformylase                                                        |
| M5005_Spy1780    | <i>rpsB</i>   | <b>-2.3</b> | 30S ribosomal protein S2                                                       |
| M5005_Spy1781    | <i>tsf</i>    | <b>-1.7</b> | Translation elongation factor Ts                                               |
| M5005_Spy1814    | <i>hisS</i>   | <b>-1.9</b> | Histidyl-tRNA synthetase                                                       |
| M5005_Spy1815    | <i>rpmF</i>   | <b>-3.6</b> | 50S ribosomal protein L32                                                      |
| M5005_Spy1816    | <i>rpmG</i>   | <b>-2.4</b> | 50S ribosomal protein L33                                                      |
| M5005_Spy1831    | <i>rpsD</i>   | <b>-1.8</b> | 30S ribosomal protein S4                                                       |
| M5005_Spy1858    | <i>trsa</i>   | <b>-1.9</b> | Tryptophanyl-tRNA synthetase                                                   |
| <b>Transport</b> |               |             |                                                                                |
| M5005_Spy0117    |               | <b>-2.2</b> | Putative transport protein                                                     |
| M5005_Spy0220    | <i>tatD</i>   | <b>-2.0</b> | Sec-independent protein translocase                                            |
| M5005_Spy0368    | <i>mtsA</i>   | <b>-2.0</b> | ABC transporter, manganese-binding protein                                     |
| M5005_Spy0662    | <i>fruA</i>   | <b>-2.0</b> | Phosphotransferase system, fructose-specific IIC component                     |
| M5005_Spy0806    | <i>srtA</i>   | <b>-2.3</b> | Multidrug resistance protein (MRP)-like transporter                            |
| M5005_Spy1067    | <i>malX</i>   | <b>-2.1</b> | Maltose/maltodextrin transporter subunit                                       |
| M5005_Spy1167    |               | <b>-1.7</b> | Putative cation transport ATPase                                               |
| M5005_Spy1379    | <i>glpF</i>   | <b>-1.9</b> | Major intrinsic protein (MIP) superfamily protein; glycerol uptake facilitator |
| M5005_Spy1399    | <i>pstIIc</i> | <b>-3.3</b> | PTS galactose-specific EIIc component; Lac.1 (cluster I) tagatose pathway      |
| M5005_Spy1400    | <i>pstIIb</i> | <b>-3.9</b> | PTS galactose-specific EIIb component; Lac.1 (cluster I) tagatose pathway      |
| M5005_Spy1401    | <i>pstIIa</i> | <b>-3.3</b> | PTS galactose-specific EIIa component; Lac.1 (cluster I) tagatose pathway      |
| M5005_Spy1628    | <i>salX</i>   | <b>-2.1</b> | ABC transporter; ATPase component                                              |
| M5005_Spy1633    | <i>lacE</i>   | <b>-4.3</b> | PTS lactose-specific EIIb component; Lac.2 (cluster II) tagatose pathway       |
| M5005_Spy1634    | <i>lacF</i>   | <b>-3.0</b> | PTS lactose-specific EIIa component; Lac.2 (cluster II) tagatose pathway       |
| M5005_Spy1728    |               | <b>-1.8</b> | ABC transporter ATP-binding protein                                            |
| M5005_Spy1784    |               | <b>-1.9</b> | Phosphotransferase system IIABC component                                      |
| M5005_Spy1846    | <i>cbiO1</i>  | <b>-1.6</b> | ABC-type cobalt transport system, ATPase component                             |
| <b>Virulence</b> |               |             |                                                                                |
| M5005_Spy0283    | <i>covS</i>   | <b>-2.5</b> | Histidine kinase of virulence gene expression                                  |
| M5005_Spy0668    | <i>mac</i>    | <b>-3.3</b> | Bacterial protein Mac1                                                         |
| M5005_Spy0777    | <i>sclB</i>   | <b>-1.7</b> | Adhesion protein belonging to the collagen superfamily                         |
| M5005_Spy1415    | <i>sdaD2</i>  | <b>-2.8</b> | Streptodornase                                                                 |

**TABLE S4 Differentially-expressed genes common to the isogenic *fabT* deletion mutant and the wild-type MGAS2221 grown at 35°C and 40°C**

**A. Up-regulated at 35°C during mid-exponential phase**

| Locus tag            | Feature ID    | FC                        |                             | Function                                          |
|----------------------|---------------|---------------------------|-----------------------------|---------------------------------------------------|
|                      |               | FC <sup>(a)</sup> -<br>WT | FC <sup>(b)</sup> -<br>FabT |                                                   |
| <b>M5005_Spy0780</b> | <i>ptsA</i>   | <b>2.7</b>                | <b>2.2</b>                  | PTS system mannose/sorbose-specific IIa component |
| <b>M5005_Spy0781</b> | <i>ptsB</i>   | <b>2.7</b>                | <b>2.2</b>                  | PTS system mannose/sorbose-specific IIb component |
| <b>M5005_Spy0783</b> | <i>ptsD</i>   | <b>2.7</b>                | <b>2.2</b>                  | PTS system mannose/sorbose-specific IIc component |
| <b>M5005_Spy1106</b> | <i>grab</i>   | <b>2.9</b>                | <b>2.0</b>                  | Gram positive anchor                              |
| <b>M5005_Spy1587</b> | <i>udp</i>    | <b>1.5</b>                | <b>1.9</b>                  | Uridine phosphorylase                             |
| <b>M5005_Spy1733</b> | M5005_Spy1733 | <b>28.5</b>               | <b>12.2</b>                 | Hypothetical protein                              |
| <b>M5005_Spy1734</b> | <i>spi_2</i>  | <b>41.2</b>               | <b>11.1</b>                 | Spi_2; peptidase C10 family protein               |
| <b>M5005_Spy1735</b> | <i>speB</i>   | <b>42.0</b>               | <b>16.3</b>                 | SpeB; peptidase C10 family protein                |
| <b>M5005_Spy1736</b> | M5005_Spy1736 | <b>18.3</b>               | <b>9.6</b>                  | Hypothetical protein                              |
| <b>M5005_Spy1765</b> | <i>csp</i>    | <b>2.7</b>                | <b>2.7</b>                  | Cold-shock protein                                |
| <b>M5005_Spy1860</b> | M5005_Spy1860 | <b>1.9</b>                | <b>1.5</b>                  | Uncharacterized conserved protein                 |

<sup>(a)</sup> FC-WT refers to fold-change in wild-type MGAS2221 when comparing gene expression at 35°C to gene expression at 40°C

<sup>(b)</sup> FC-FabT refers to fold-change in the *fabT* deletion mutant MGAS2221D*fabT* when comparing gene expression at 35°C to gene expression at 40°C

**B. Up-regulated at 40°C during mid-exponential phase**

| Locus tag            | Feature ID    | FC          |            | Function                                        |
|----------------------|---------------|-------------|------------|-------------------------------------------------|
|                      |               | FC-WT       | FC-FabT    |                                                 |
| <b>M5005_Spy0346</b> | M5005_Spy0346 | <b>1.9</b>  | <b>2.0</b> | Hypothetical protein                            |
| <b>M5005_Spy0347</b> | <i>nrdF.1</i> | <b>2.3</b>  | <b>1.9</b> | Class I ribonucleotide reductase, subunit beta  |
| <b>M5005_Spy0348</b> | <i>nrdI</i>   | <b>2.4</b>  | <b>1.8</b> | Class I ribonucleotide reductase, subunit alpha |
| <b>M5005_Spy0349</b> | <i>nrdE.1</i> | <b>2.3</b>  | <b>2.0</b> | Class I ribonucleotide reductase                |
| <b>M5005_Spy1052</b> | <i>int.1</i>  | <b>2.3</b>  | <b>2.0</b> | φ 5005.1 protein                                |
| <b>M5005_Spy1416</b> | M5005_Spy1416 | <b>8.4</b>  | <b>2.8</b> | φ 5005.3 protein                                |
| <b>M5005_Spy1418</b> | M5005_Spy1418 | <b>9.3</b>  | <b>2.7</b> | φ 5005.3 protein                                |
| <b>M5005_Spy1419</b> | M5005_Spy1419 | <b>9.9</b>  | <b>2.9</b> | φ 5005.3 protein                                |
| <b>M5005_Spy1420</b> | M5005_Spy1420 | <b>11.5</b> | <b>2.8</b> | φ 5005.3 protein                                |
| <b>M5005_Spy1421</b> | M5005_Spy1421 | <b>9.5</b>  | <b>2.9</b> | φ 5005.3 protein                                |
| <b>M5005_Spy1422</b> | M5005_Spy1422 | <b>10.3</b> | <b>3.0</b> | φ 5005.3 protein                                |
| <b>M5005_Spy1423</b> | M5005_Spy1423 | <b>10.6</b> | <b>2.9</b> | φ 5005.3 protein                                |
| <b>M5005_Spy1424</b> | M5005_Spy1424 | <b>10.0</b> | <b>3.0</b> | φ 5005.3 protein                                |
| <b>M5005_Spy1425</b> | M5005_Spy1425 | <b>10.3</b> | <b>2.7</b> | φ 5005.3 protein                                |
| <b>M5005_Spy1426</b> | M5005_Spy1426 | <b>9.3</b>  | <b>2.6</b> | φ 5005.3 protein                                |
| <b>M5005_Spy1427</b> | M5005_Spy1427 | <b>10.6</b> | <b>2.8</b> | φ 5005.3 protein                                |
| <b>M5005_Spy1428</b> | M5005_Spy1428 | <b>11.2</b> | <b>2.7</b> | φ 5005.3 protein                                |

|                      |               |             |            |                                    |
|----------------------|---------------|-------------|------------|------------------------------------|
| <b>M5005_Spy1429</b> | M5005_Spy1429 | <b>10.9</b> | <b>2.4</b> | φ 5005.3 protein                   |
| <b>M5005_Spy1430</b> | M5005_Spy1430 | <b>10.9</b> | <b>2.7</b> | φ 5005.3 protein                   |
| <b>M5005_Spy1431</b> | M5005_Spy1431 | <b>8.3</b>  | <b>2.6</b> | φ 5005.3 protein                   |
| <b>M5005_Spy1432</b> | M5005_Spy1432 | <b>11.0</b> | <b>2.7</b> | φ 5005.3 protein                   |
| <b>M5005_Spy1433</b> | M5005_Spy1433 | <b>9.8</b>  | <b>2.5</b> | φ 5005.3 protein                   |
| <b>M5005_Spy1435</b> | M5005_Spy1435 | <b>9.3</b>  | <b>2.6</b> | φ 5005.3 protein                   |
| <b>M5005_Spy1436</b> | M5005_Spy1436 | <b>10.4</b> | <b>2.8</b> | φ 5005.3 protein                   |
| <b>M5005_Spy1437</b> | M5005_Spy1437 | <b>13.0</b> | <b>3.6</b> | φ 5005.3 protein                   |
| <b>M5005_Spy1438</b> | M5005_Spy1438 | <b>9.7</b>  | <b>2.6</b> | φ 5005.3 protein                   |
| <b>M5005_Spy1439</b> | M5005_Spy1439 | <b>9.9</b>  | <b>2.6</b> | φ 5005.3 protein                   |
| <b>M5005_Spy1440</b> | M5005_Spy1440 | <b>9.2</b>  | <b>3.1</b> | φ 5005.3 protein                   |
| <b>M5005_Spy1441</b> | M5005_Spy1441 | <b>10.6</b> | <b>2.8</b> | φ 5005.3 protein                   |
| <b>M5005_Spy1793</b> | <i>nrdD</i>   | <b>1.7</b>  | <b>1.7</b> | Class III ribonucleotide reductase |
| <b>M5005_Spy1840</b> | <i>trmU</i>   | <b>2.0</b>  | <b>1.7</b> | tRNA methyl transferase            |

### C. Up-regulated at 35°C during stationary phase

| <b>Locus tag</b>     | <b>Feature ID</b> | <b>FC-<br/>WT</b> | <b>FC-<br/>FabT</b> | <b>Function</b>                                                     |
|----------------------|-------------------|-------------------|---------------------|---------------------------------------------------------------------|
| <b>M5005_Spy0032</b> | M5005_Spy0032     | <b>1.6</b>        | <b>1.6</b>          | Putative chromosome segregation protein                             |
| <b>M5005_Spy0360</b> | M5005_Spy0360     | <b>1.6</b>        | <b>2.0</b>          | Predicted dehydrogenase                                             |
| <b>M5005_Spy0614</b> | <i>pepT</i>       | <b>1.7</b>        | <b>1.6</b>          | Peptidase T                                                         |
| <b>M5005_Spy0616</b> | M5005_Spy0616     | <b>2.1</b>        | <b>1.5</b>          | Ferredoxin                                                          |
| <b>M5005_Spy0617</b> | M5005_Spy0617     | <b>1.7</b>        | <b>1.5</b>          | Cytidine monophosphate kinase                                       |
| <b>M5005_Spy0780</b> | <i>ptsA</i>       | <b>3.6</b>        | <b>3.1</b>          | PTS system mannose/sorbose-specific IIa component                   |
| <b>M5005_Spy0781</b> | <i>ptsB</i>       | <b>3.7</b>        | <b>1.9</b>          | PTS system mannose/sorbose-specific IIb component                   |
| <b>M5005_Spy0784</b> | M5005_Spy0784     | <b>3.5</b>        | <b>2.1</b>          | Putative histidine kinase                                           |
| <b>M5005_Spy0785</b> | M5005_Spy0785     | <b>3.2</b>        | <b>2.0</b>          | Putative response regulator                                         |
| <b>M5005_Spy0786</b> | M5005_Spy0786     | <b>2.9</b>        | <b>1.7</b>          | Substrate binding domain of LysR transcriptional regulators         |
| <b>M5005_Spy0790</b> | <i>gabD</i>       | <b>1.5</b>        | <b>1.6</b>          | Succinate-semialdehyde dehydrogenase                                |
| <b>M5005_Spy0872</b> | <i>nox</i>        | <b>1.5</b>        | <b>1.7</b>          | NADH oxidase                                                        |
| <b>M5005_Spy0877</b> | M5005_Spy0877     | <b>2.1</b>        | <b>2.6</b>          | Hypothetical protein                                                |
| <b>M5005_Spy0878</b> | M5005_Spy0878     | <b>1.9</b>        | <b>1.9</b>          | Hypothetical protein                                                |
| <b>M5005_Spy1325</b> | <i>raiA</i>       | <b>1.9</b>        | <b>1.8</b>          | RaiA ("ribosome-associated inhibitor A)                             |
| <b>M5005_Spy1351</b> | M5005_Spy1351     | <b>1.8</b>        | <b>1.6</b>          | Nucleic acid methyltransferase                                      |
| <b>M5005_Spy1411</b> | M5005_Spy1411     | <b>1.7</b>        | <b>1.6</b>          | Hypothetical protein                                                |
| <b>M5005_Spy1413</b> | M5005_Spy1413     | <b>1.6</b>        | <b>1.6</b>          | Hypothetical protein                                                |
| <b>M5005_Spy1601</b> | M5005_Spy1601     | <b>1.5</b>        | <b>2.4</b>          | Band 7 domain protein. It may cluster to form membrane microdomains |
| <b>M5005_Spy1711</b> | <i>lmb</i>        | <b>2.1</b>        | <b>1.5</b>          | Metal-binding protein AcdA                                          |
| <b>M5005_Spy1860</b> | M5005_Spy1860     | <b>4.6</b>        | <b>1.5</b>          | Hypothetical membrane protein                                       |

#### D. Up-regulated at 40°C during the stationary phase

| Locus tag     | Feature ID    | FC-WT | FC-FabT | Function                                           |
|---------------|---------------|-------|---------|----------------------------------------------------|
| M5005_Spy0308 | M5005_Spy0308 | 1.7   | 1.5     | Structural maintenance of chromosome (SMC) protein |
| M5005_Spy0347 | <i>nrdF.1</i> | 1.9   | 3.3     | Class I ribonucleotide reductase, subunit beta     |
| M5005_Spy0348 | <i>nrdI</i>   | 1.8   | 5.0     | Class I ribonucleotide reductase, subunit alpha    |
| M5005_Spy0349 | <i>nrdE.1</i> | 2.0   | 4.3     | Class I ribonucleotide reductase                   |
| M5005_Spy0869 | M5005_Spy0869 | 2.2   | 1.7     | Lysozyme-like protein                              |
| M5005_Spy0921 | M5005_Spy0921 | 4.8   | 1.7     | EF-3 elongation factor                             |
| M5005_Spy0922 | <i>pdxK</i>   | 5.9   | 2.5     | Unknown function protein                           |
| M5005_Spy0923 | M5005_Spy0923 | 5.0   | 2.2     | Pyridoxal kinase                                   |
| M5005_Spy0924 | M5005_Spy0924 | 6.0   | 2.6     | HTH and aminotransferase domain protein            |
| M5005_Spy1026 | M5005_Spy1026 | 6.9   | 2.5     | φ 5005.1 protein                                   |
| M5005_Spy1027 | M5005_Spy1027 | 4.8   | 2.2     | φ 5005.1 protein                                   |
| M5005_Spy1029 | M5005_Spy1029 | 4.8   | 2.5     | φ 5005.1 protein                                   |
| M5005_Spy1030 | M5005_Spy1030 | 5.4   | 2.1     | φ 5005.1 protein                                   |
| M5005_Spy1031 | M5005_Spy1031 | 5.6   | 2.4     | φ 5005.1 protein                                   |
| M5005_Spy1032 | M5005_Spy1032 | 4.7   | 2.0     | φ 5005.1 protein                                   |
| M5005_Spy1033 | M5005_Spy1033 | 4.7   | 2.0     | φ 5005.1 protein                                   |
| M5005_Spy1035 | M5005_Spy1035 | 3.6   | 2.2     | φ 5005.1 protein                                   |
| M5005_Spy1039 | M5005_Spy1039 | 4.8   | 2.7     | φ 5005.1 protein                                   |
| M5005_Spy1041 | M5005_Spy1041 | 9.2   | 2.1     | φ 5005.1 protein                                   |
| M5005_Spy1042 | M5005_Spy1042 | 5.3   | 2.0     | φ 5005.1 protein                                   |
| M5005_Spy1043 | M5005_Spy1043 | 5.5   | 2.2     | φ 5005.1 protein                                   |
| M5005_Spy1045 | M5005_Spy1045 | 3.0   | 2.1     | φ 5005.1 protein                                   |
| M5005_Spy1049 | M5005_Spy1049 | 3.1   | 1.9     | φ 5005.1 protein                                   |
| M5005_Spy1222 | <i>int.2</i>  | 2.9   | 4.7     | φ 5005.2 protein                                   |
| M5005_Spy1316 | M5005_Spy1316 | 2.0   | 4.2     | Uncharacterized conserved protein                  |
| M5005_Spy1317 | M5005_Spy1317 | 2.1   | 3.7     | Alpha-mannosidase                                  |
| M5005_Spy1327 | <i>comFA</i>  | 4.5   | 2.7     | DNA uptake protein                                 |
| M5005_Spy1367 | <i>ftsL</i>   | 1.6   | 1.6     | Septum formation initiator                         |
| M5005_Spy1414 | M5005_Spy1414 | 8.5   | 3.0     | φ 5005.3 protein                                   |
| M5005_Spy1420 | M5005_Spy1420 | 15.4  | 3.4     | φ 5005.3 protein                                   |
| M5005_Spy1432 | M5005_Spy1432 | 9.0   | 2.1     | φ 5005.3 protein                                   |
| M5005_Spy1437 | M5005_Spy1437 | 12.9  | 2.5     | φ 5005.3 protein                                   |
| M5005_Spy1459 | M5005_Spy1459 | 4.5   | 1.8     | φ 5005.3 protein                                   |
| M5005_Spy1467 | <i>int.3</i>  | 2.2   | 6.5     | φ 5005.3 protein                                   |
| M5005_Spy1656 | M5005_Spy1656 | 1.6   | 1.5     | Hypothetical protein                               |
| M5005_Spy1793 | <i>nrdD</i>   | 1.8   | 1.9     | Class III ribonucleotide reductase                 |
| M5005_Spy1822 | M5005_Spy1822 | 2.0   | 1.9     | Putative transcriptional regulator                 |

## SUPPLEMENTAL FIGURES

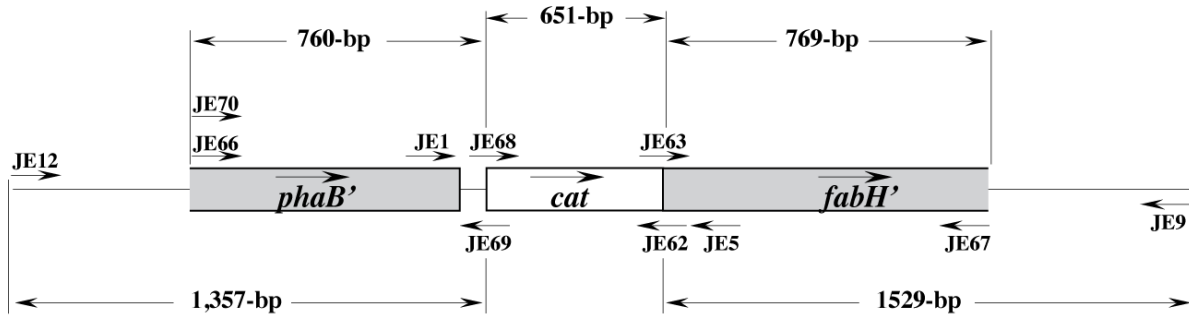

JE1: 5'- GGAAGATTTTAAAGAAGGTGTCATAGC - 3'

JE5: 5'- CCACTCATGACTAGTGTCCATTATGCTAG - 3'

JE9: 5'- CCCAAGCCATTCCCTTGAAAAATGGGGTAATC - 3'

JE12: 5'- CCAACGGTTCATGGCGATGTTGAGATGGC - 3'

JE62: 5'- ATTTTAGAAAAAATCATTTATAAAAAGCCAGTCATTAGGCCTATCTGAC - 3'

JE63: 5'- GACTGGCTTTTATAAATGATTTTTTCTAAAATCAGTCAGGTAGCCC - 3'

JE66: 5'- CTGGTAGCATTAGCAGAAGTTAAACGCG - 3'

JE67: 5'- CAAGTATACGACGATTAGCTTGATGCAATAAAC - 3'

JE68: 5'- GCTAGGAGGTGTTTACATGAACTTTAATAAAAATTGATTTAGACAATTGGAAGAG - 3'

JE69: 5'- CAATTTTATTAAGTTCATGTAAACACCTCCTAGCAATAAACTTTGACAATC - 3'

JE70: 5'- CGCGGATCCCTGGTAGCATTAGCAGAAGTTAAACGCG - 3'

**FIG S1 Strategy to replace *fabT* with *cat*.** **Top.** Schematic representing the replacement of *fabT* with *cat*. The upstream gene, *phaB*, and downstream gene, *fabH* are shown; arrows indicate the direction of transcription. Primers used to amplify the respective fragments and the sizes of the corresponding PCR fragments are shown. **Bottom.** DNA sequences of the primers used for PCR reactions.

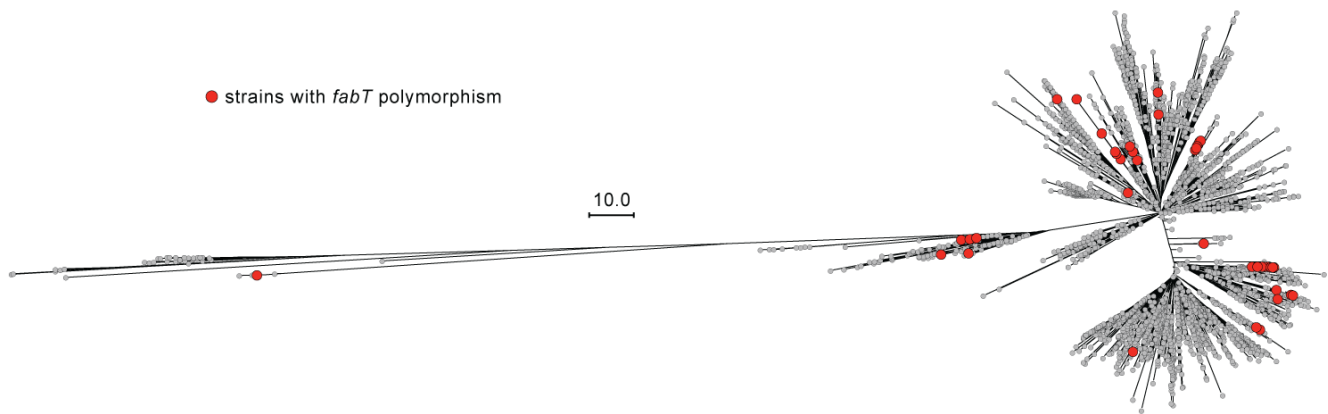

**FIG S2 Neighbor-joining radial phylogram for serotype M1 strains isolated from human epidemics.** Phylogenetic tree showing genetic relationships among 3,615 serotype M1 strains on two continents spanning from 1969 through 2013. This phylogram is based on 12,355 core chromosomal SNPs after excluding SNPs in the 36-kb *purA*-to-*nadC* region of recombination (12). Strains containing polymorphisms in the *fabT* gene or *fabT* promoter sequence are shown in red. They are distributed among different branches of pre- and post-epidemic isolates and have different alleles of the *fabT* gene, indicating that the polymorphism in *fabT* gene arose independently in the human host.



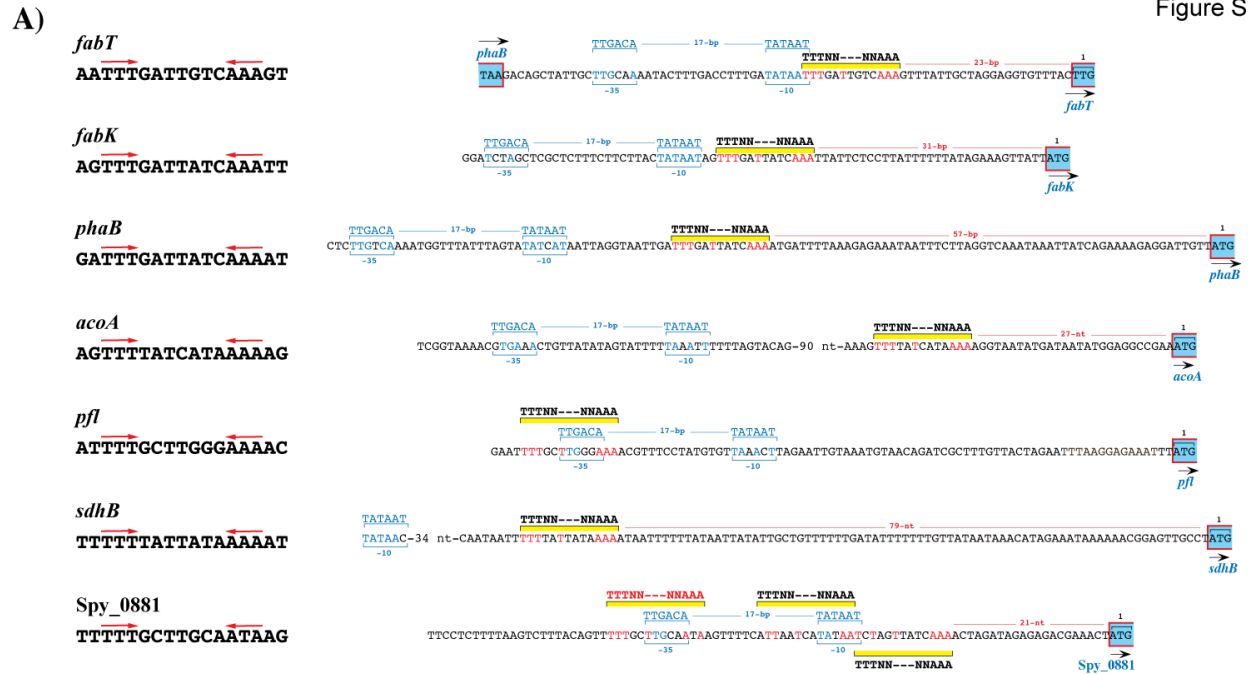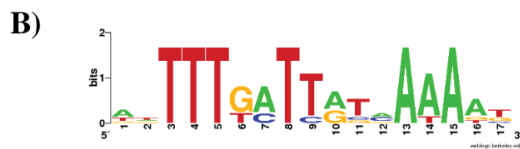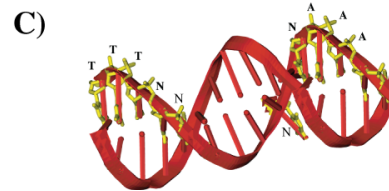

**FIG S3 Consensus binding sequence for FabT in M1GAS. (A)** Putative FabT-binding DNA sequences found upstream of *fabT*, *fabK*, *phaB*, *acoA*, *pfl*, *sdhB*, and Spy\_0881. The position of the putative FabT sites within the DNA sequence is indicated. Spy\_0881 contains more than one putative FabT-binding sequence. The selected FabT site for WebLogo is depicted in red. Matches to the FabT consensus sequence in the respective DNA sequences are indicated in red. Promoter sequences are depicted in blue. **(B)** FabT consensus derived from the above DNA sequences using WebLogo. **(C)** Position of the inverted repeats constituting the consensus **TTTNNNNNNNAAA** on DNA.

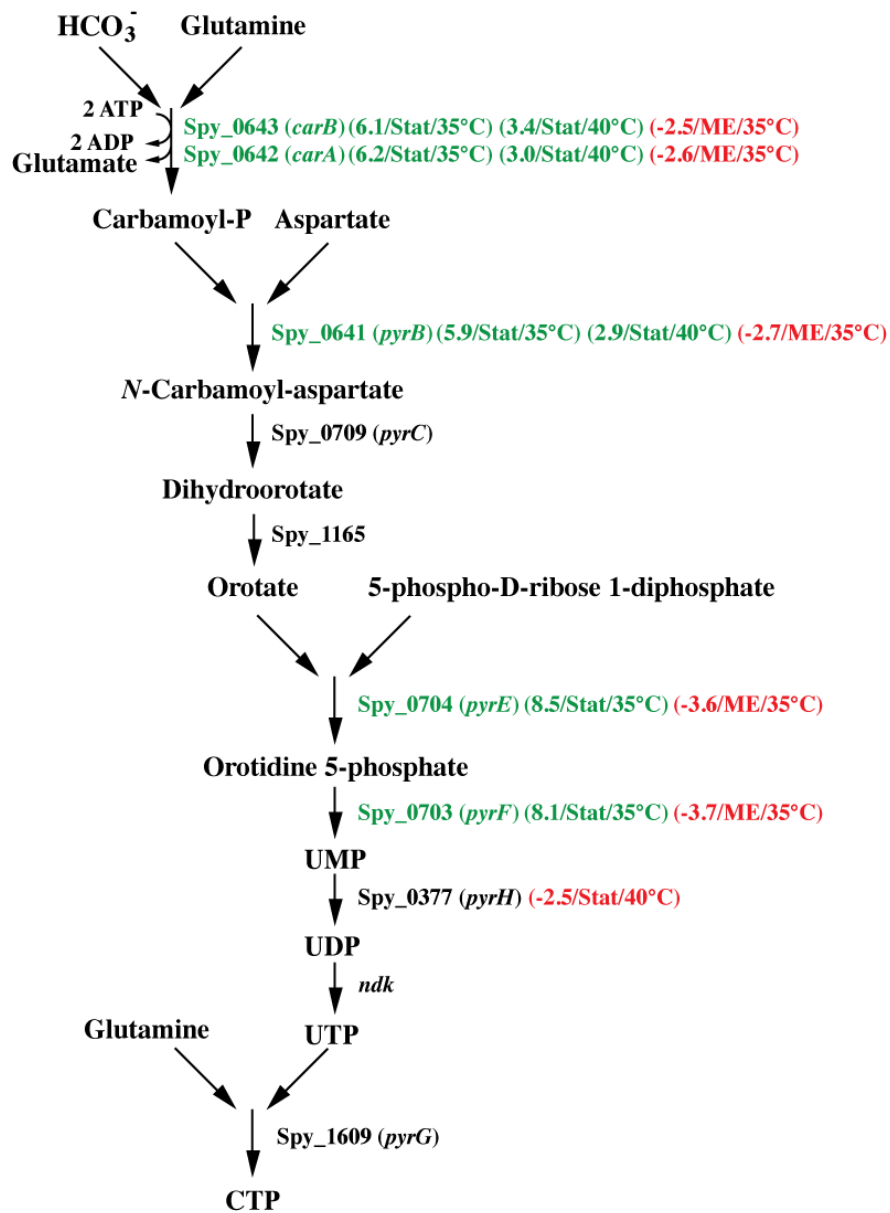

**FIG S4 FabT regulation of *de novo* pyrimidine synthesis.** Differentially regulated genes in the pyrimidine *de novo* biosynthesis pathway are represented either in green (upregulated in the FabT mutant), or red (downregulated). The fold-expression values are positive for upregulated genes, and negative for downregulated genes. The phases of growth are either mid-exponential (ME), or stationary (Stat). Fold expression values

and growth phase are denoted in parentheses, immediately after the gene designations.

35° and 40°C refer to the two growth temperatures.

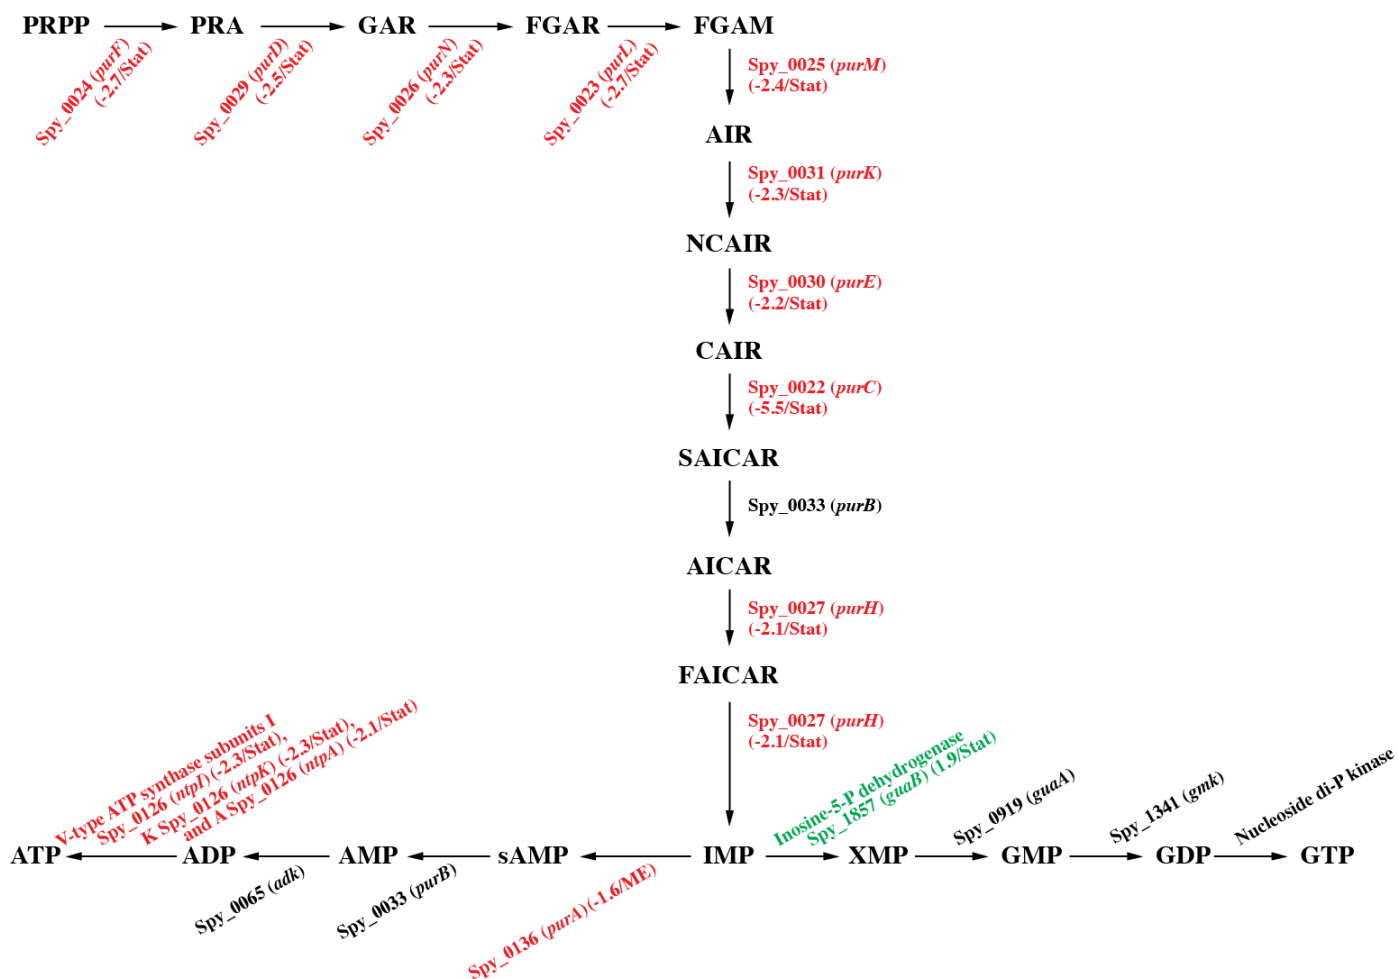

**FIG S5 FabT regulation of *de novo* purine synthesis.** Differentially regulated genes in the purine *de novo* biosynthesis pathway are represented either in green (upregulated in the FabT mutant), or red (downregulated). The fold expression values are positive for upregulated genes, and negative for downregulated genes. The phases of growth are either mid-exponential (ME), or stationary (Stat). Fold-expression values and growth phase are denoted in parentheses, immediately after the gene designations.
